# Supplementary material
Source: PubMed Central journal article supplement (PMC4260666)

## Supporting Information

Photoredox Catalysis in a Complex Pharmaceutical Setting: Toward the Preparation of JAK2 Inhibitor LY2784544

James Douglas,<sup>†,‡</sup> Kevin. P. Cole,<sup>‡</sup> Corey R. J. Stephenson\*<sup>†</sup>

<sup>†</sup> Department of Chemistry, University of Michigan, Ann Arbor, MI 48105.

crjsteph@umich.edu

<sup>‡</sup>Small Molecule Design and Development, Lilly Research Laboratories, Eli Lilly and Company, Indianapolis, IN 46285

## Table of Contents

|                                                                                               |            |
|-----------------------------------------------------------------------------------------------|------------|
| <b>1.0 Initial reaction conditions and HPLC data.....</b>                                     | <b>S3</b>  |
| <b>2.0 Additional optimisation information .....</b>                                          | <b>S5</b>  |
| <b>2.1 Reactions on different scale with the same surface area (cm<sup>2</sup>/mmol).....</b> | <b>S9</b>  |
| <b>2.2 Variation of light source .....</b>                                                    | <b>S10</b> |
| <b>3.0 Exo degradation studies. ....</b>                                                      | <b>S11</b> |
| <b>4.0 Effect of base.....</b>                                                                | <b>S12</b> |
| <b>5.0 Variation of photocatalyst.....</b>                                                    | <b>S13</b> |
| <b>6.0 Solvent additives effects and the use of DMPU.....</b>                                 | <b>S13</b> |
| <b>7.0 Final reaction conditions .....</b>                                                    | <b>S14</b> |
| <b>8.0 Chiral HPLC trace for 21 .....</b>                                                     | <b>S15</b> |
| <b>9.0 Attempted expansion to other heterocycles.....</b>                                     | <b>S16</b> |
| <b>10.0 Quenching studies.....</b>                                                            | <b>S18</b> |
| <b>11.0 Lights-on-lights-off experiment .....</b>                                             | <b>S19</b> |
| <b>12.0 NMR Spectra.....</b>                                                                  | <b>S20</b> |

## 1.0 Initial reaction conditions and HPLC data

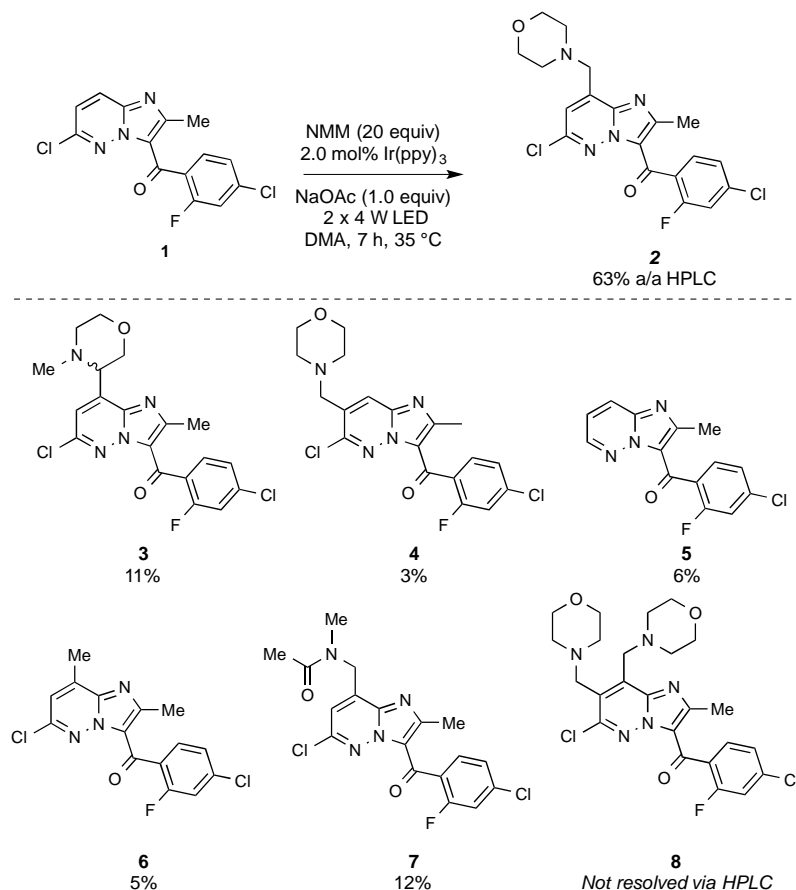

**Scheme S1.** The initial reaction with identified components via HPLC

To a 25 mL round bottom flask (RBF) open to air was added **1** (125 mg, 0.386 mmol, 1.0 equiv), Tris[2-phenylpyridinato-C<sup>2</sup>,N]iridium(III) (Ir(ppy)<sub>3</sub>) (5.00 mg, 0.008 mmol, 0.02 equiv), sodium acetate (32.0 mg, 390 μmol, 1.0 equiv), DMA (2.5 mL) and *N*-methylmorpholine (0.850 mL, 7.71 mmol, 20 equiv) and the yellow heterogeneous solution was irradiated with 2 × 4 W LED strips placed in a circular loop around the flask. Aluminum foil was placed over the lights around the flask to contain the light (see figure S1). After 1 h the internal temperature of the flask had stabilized at 35 °C. The reaction was monitored via HPLC using an Agilent 1090 fitted with a Eclipse XDB-C8 ZORBAX 993967-90 4.6 x 150 mm column running a gradient of water (0.1% TFA v/v) to 80% Water:MeCN (0.1% TFA v/v) with the detector set to 260 nm.

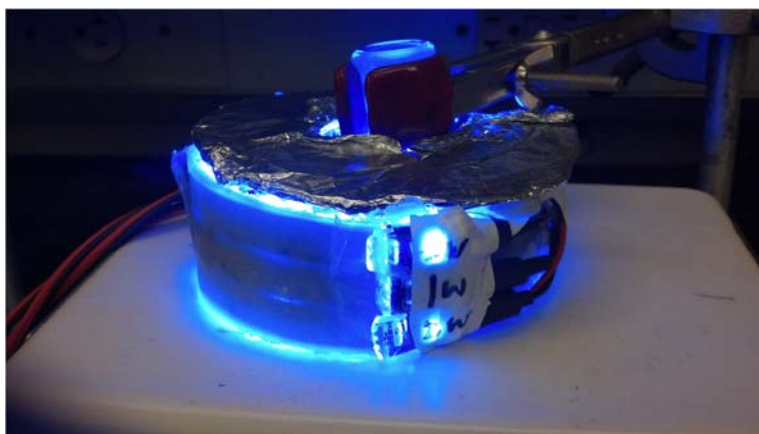

**Figure S1.** The initial reaction set up with  $2 \times 4$  W LED strips.

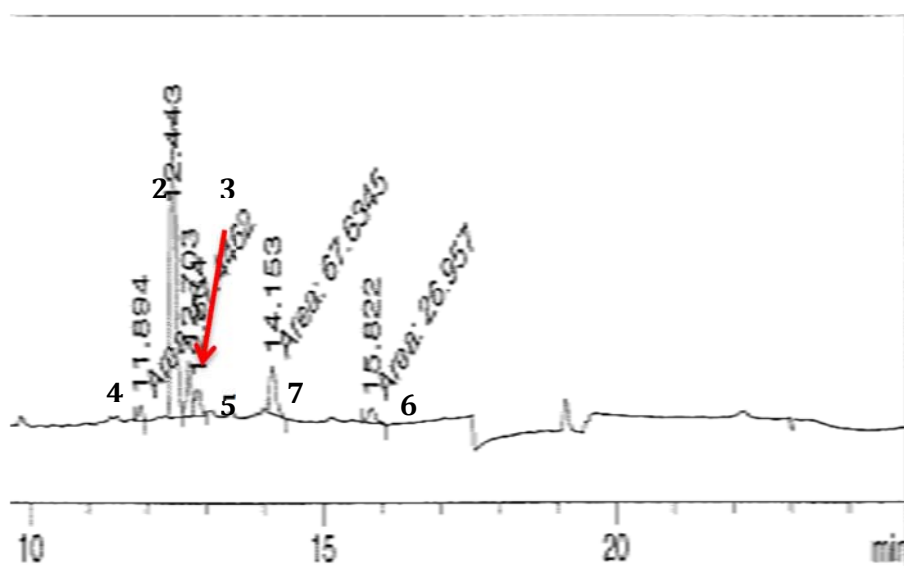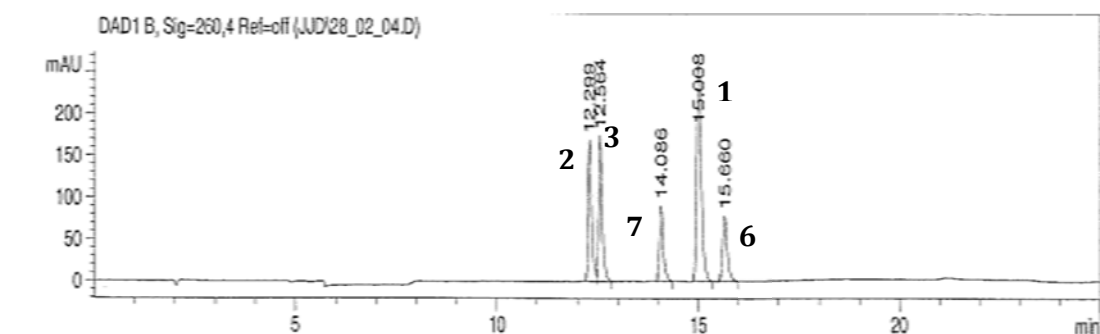

**Figure S2.** HPLC trace and standards

## 2.0 Additional optimisation information

### General procedure for reaction optimisation

To a 10 mL RBF was added **1** (75.0 mg, 0.231 mmol, 1.0 equiv), sodium acetate (19.0 mg, 0.231 mmol, 1.0 equiv), Ir(ppy)<sub>3</sub> (1.50 mg, 2.31 μmol, 0.01 equiv), DMA (1.50 mL) and *N*-methylmorpholine (510 μL, 4.63 mmol, 20 equiv) to give a heterogeneous yellow solution. The flask was placed in a 25 mL jacketed beaker with *i*PrOH as the internal coolant connected to a recirculating heater chiller set to the required temperature. The flask was stirred for 2 min open to air before switching on the stated number of LED strips. (see figure S5) The reaction was monitored via UPLC and after a given time worked up with the addition of EtOAc (50 mL) followed by washing with water (50 mL) and 5% LiCl (2 × 25 mL). The organic phase was then dried (Na<sub>2</sub>SO<sub>4</sub>) and concentrated *in vacuo* to give a crude product that was purified via automated column chromatography under the stated conditions.

*In situ* yields were calculated by obtaining a concentration of the requisite analyte (20 μL reaction sample) via a UPLC calibration curve (5 individual points of 3 separate samples) and calculating yield *via* the known volume of the reaction. At ≤20 °C no significant loss of volume due to either NMM or DMA evaporation was observed. UPLC methods were created for both a Waters® Acuity H-Class UPLC fitted with a PDA or QDA mass detector accordingly.

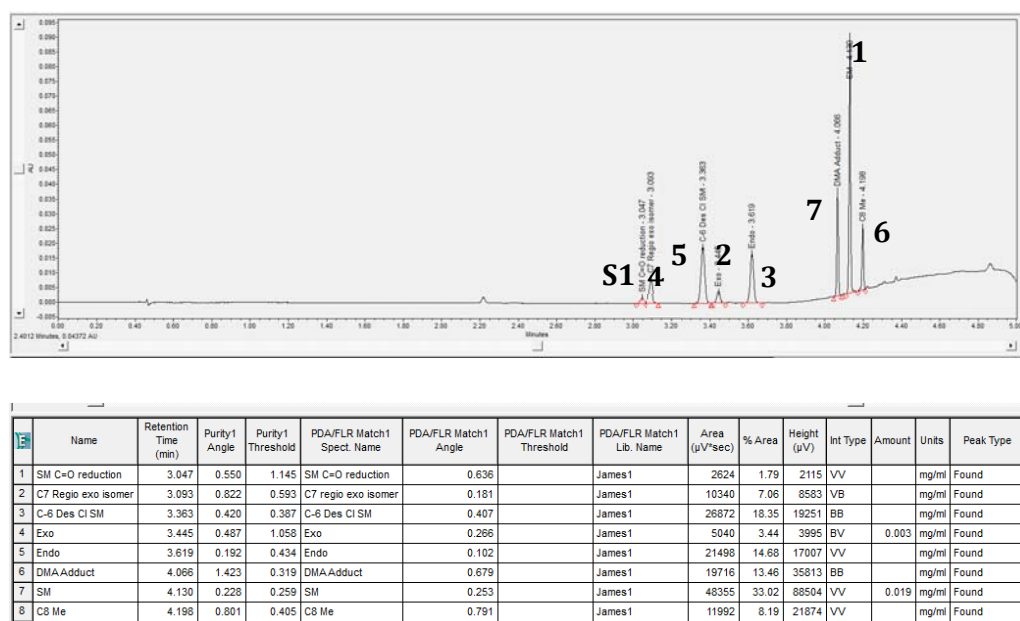

**Figure S3.** UPLC standards and example of peak matching/purity information

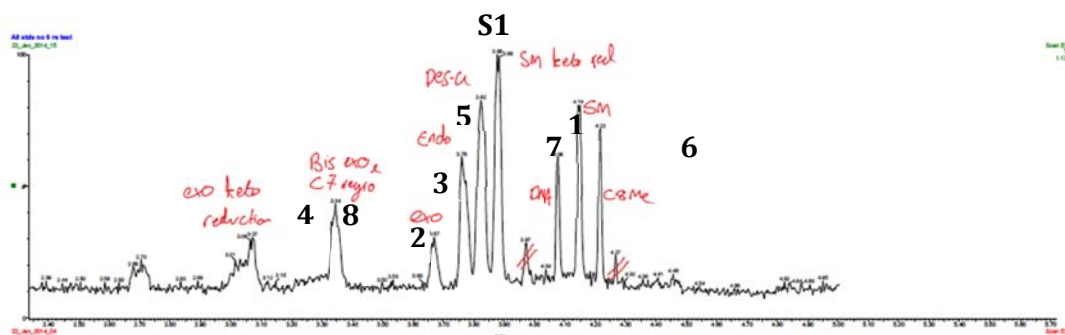

Example of peak resolution via mass selection of 422

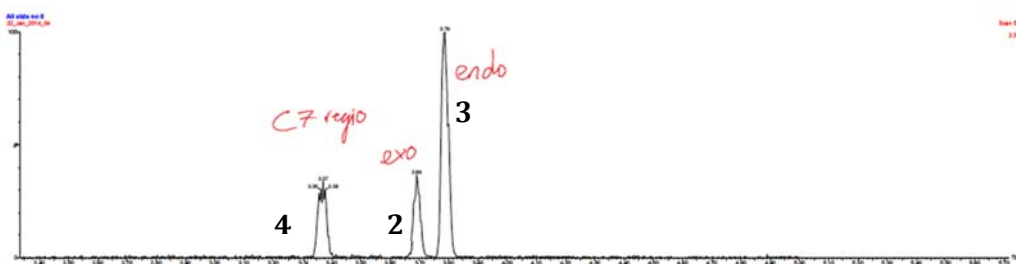

**Figure S4.** UPLC mass detection (QDa) showing standards and mass selection.

**(4-chloro-2-fluorophenyl)(6-chloro-2-methylimidazo[1,2-*b*]pyridazin-3-yl)methanol. S1**

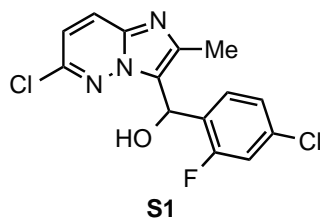

The formation of this impurity was hypothesized but not observed.

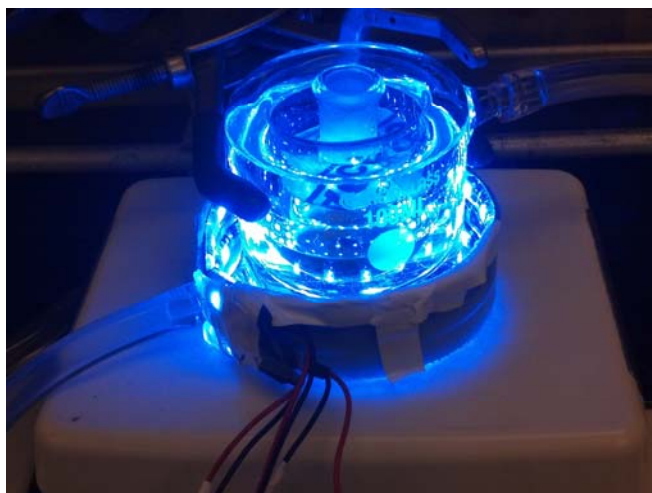

**Figure S5.** Reaction set up with jacketed beaker and chiller.

At 0 °C condensation was formed on the outside of the beaker on humid days. This had no apparent effect on reactivity. Further lowering the temperature to -5 °C caused significant ice formation overnight and prevented efficient reactions at this temperature.

**Table 1 Entry 2**

Using 0.231 mmol of 1 with a 1 W LED light strip at 5 °C for 8 h

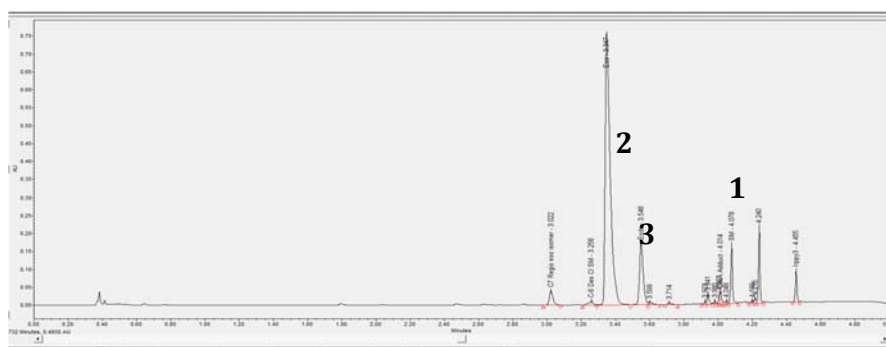

**Figure S6.** UPLC trace for Table 1 Entry 2

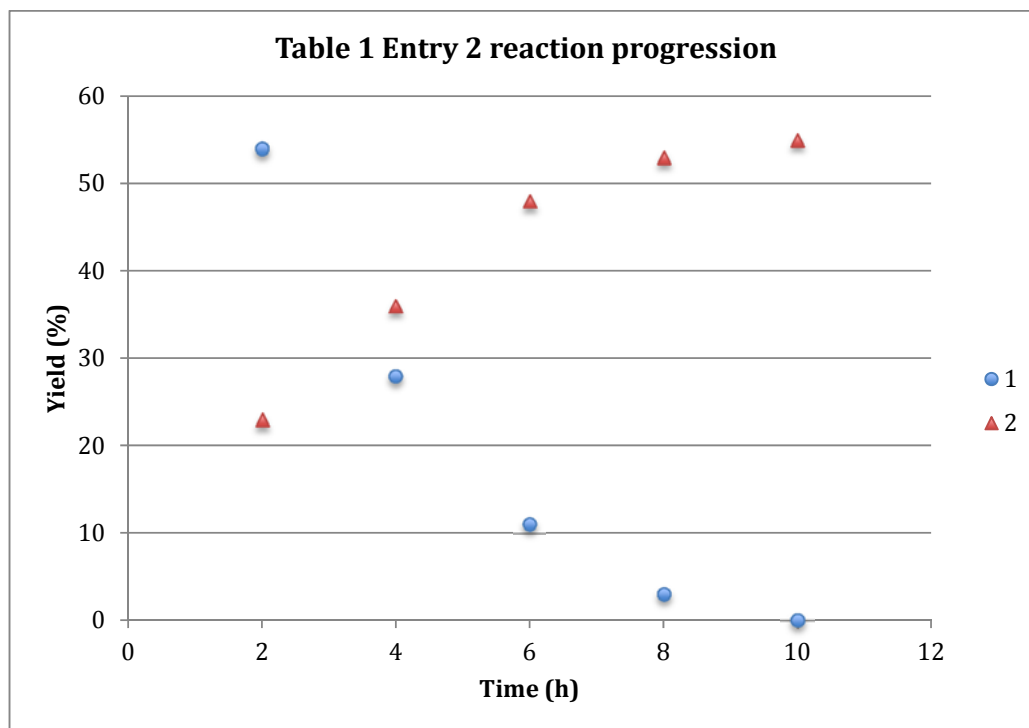

**Figure S7.** Reaction progression (yield of **1** and **2**) of Table 1 Entry 2.

**Table 1 Entry 3**

Using 0.50 mmol of **1** with a 1 W LED light strip at 22 °C for 16 h

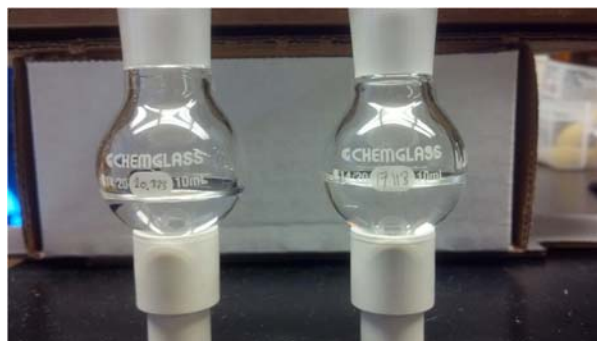

**Figure S8.** Showing the similar surface area of the standard reaction (0.231 mmol) and a reaction at twice the scale (0.5 mmol).



## 2.1 Reactions on different scale with the same surface area (cm<sup>2</sup>/mmol)

Reaction performed on a 0.13 mmol scale in a 21 mm diameter vial (27 cm<sup>2</sup>/mmol) for 16 h.

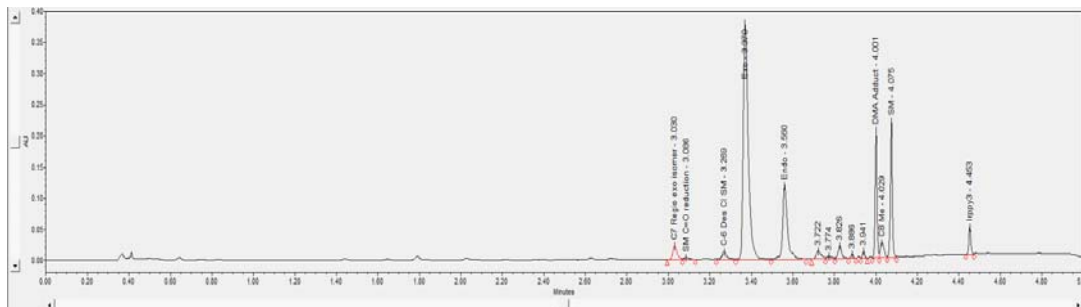

**Figure S9.** 0.13 mmol scale in a 21 mm diameter vial (27 cm<sup>2</sup>/mmol)

Reaction performed on a 0.22 mmol scale in a 27 mm diameter vial (26 cm<sup>2</sup>/mmol) for 16 h.

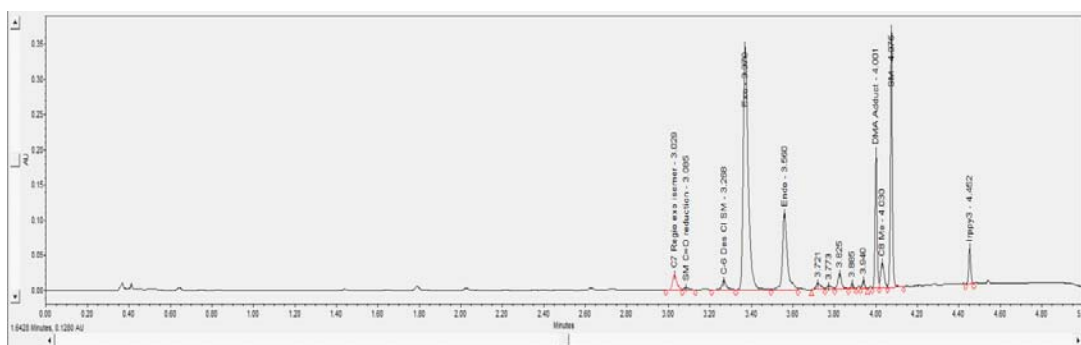

**Figure S10.** 0.22 mmol scale in a 27 mm diameter vial (26 cm<sup>2</sup>/mmol)

## 2.2 Variation of light source

Calculated yields of **1** and **2**. Known compounds are the total of crude % a/a. 35 W LED corresponds a LED puck (<http://www.luxeonstar.com/Royal-Blue-447-5nm-7-LED-40mm-Round-Assembly-p/sr-02-r0425.htm>)

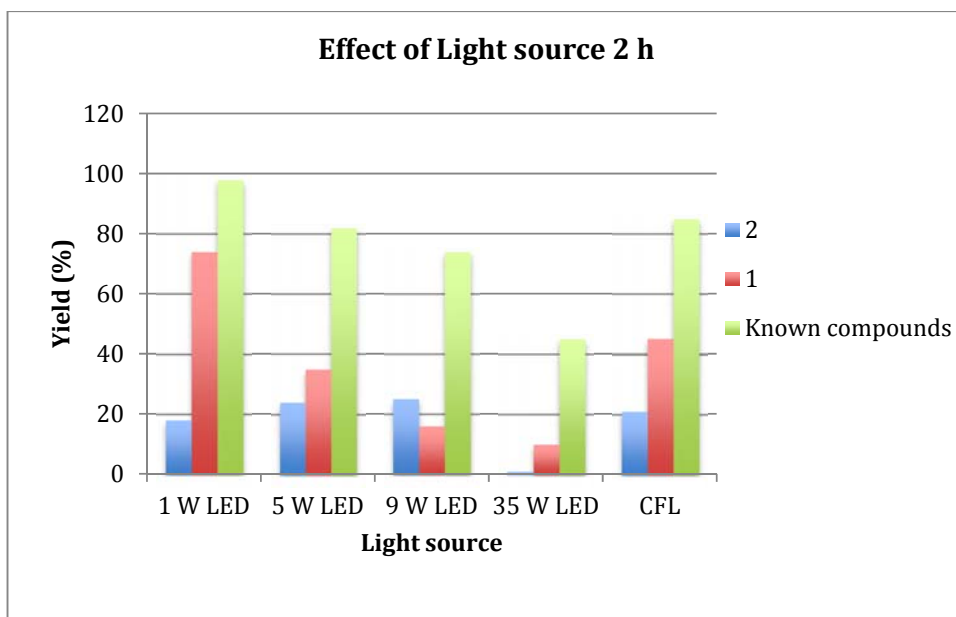

**Figure S11.** Showing the effect of light source after 2 h.

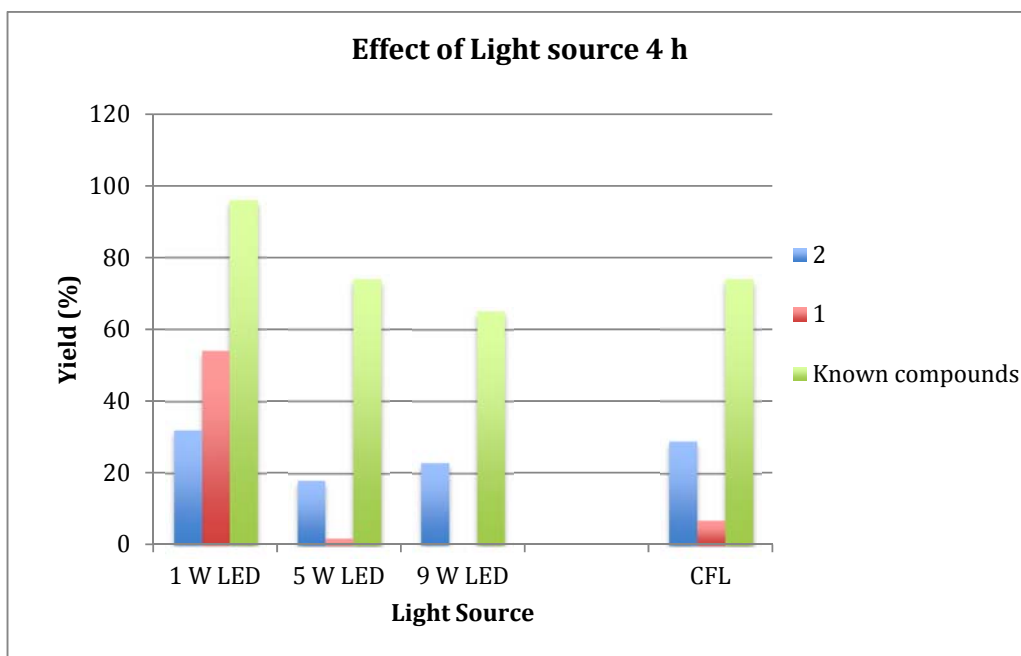

**Figure S12.** Showing the effect of light source after 4 h.

### 3.0 Exo degradation studies.

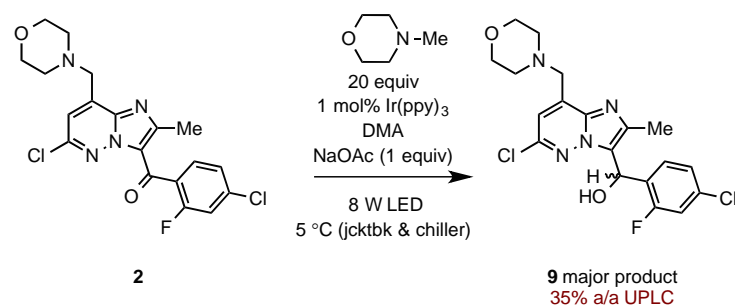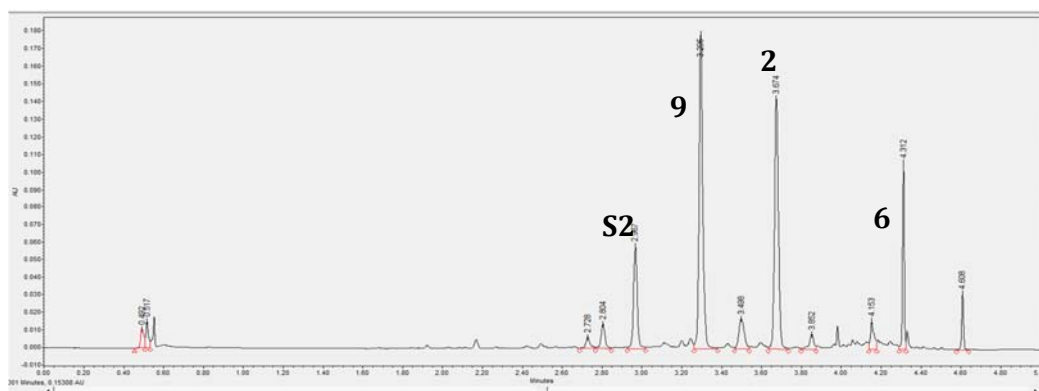

**Figure S13.** Crude UPLC trace showing **9** as the major product of degradation of **2**.

(4-chloro-2-fluorophenyl)(2-methyl-8-(morpholinomethyl)imidazo[1,2-*b*]pyridazin-3-yl)methanone **S2**

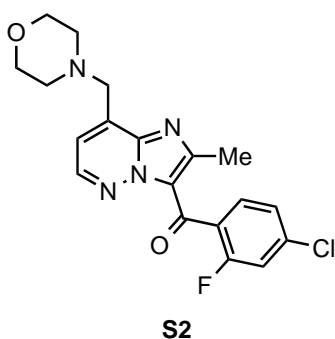

**S2** was identified via UPLC mass spec and <sup>1</sup>H NMR spectroscopy analysis of the crude reaction mixture. The high polarity of **S2** and **9** made isolation difficult.

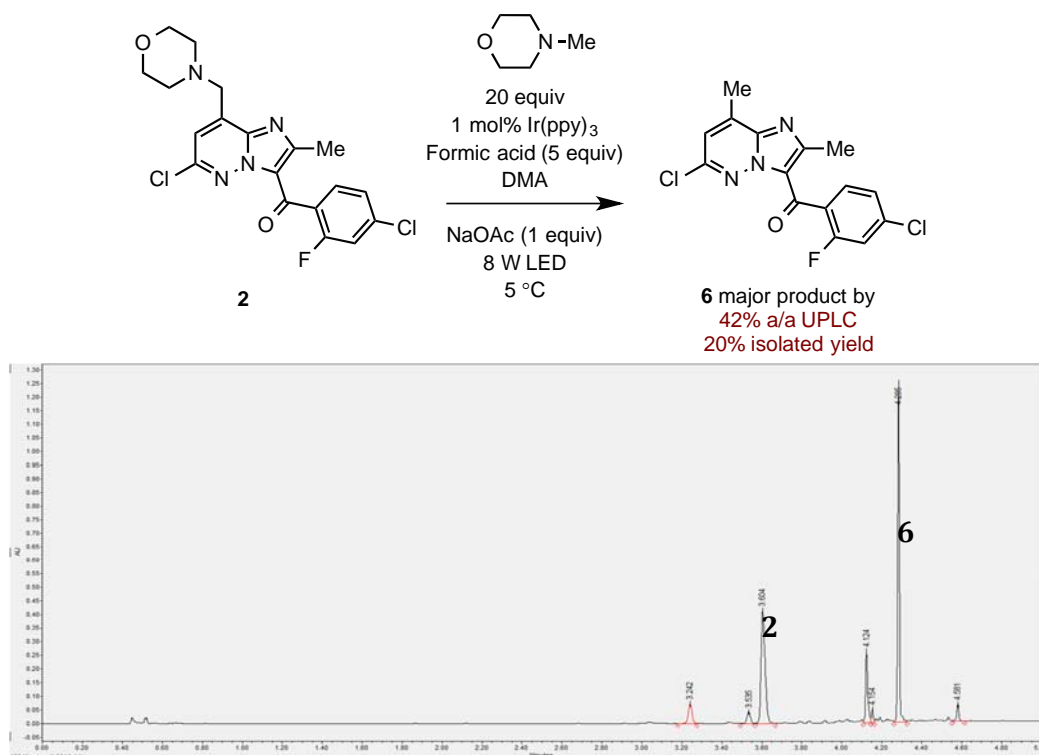

**Figure S14.** Crude UPLC trace showing **6** as the major product of degradation of **2**.

#### 4.0 Effect of base

**Table S1:** Effect of base

| Entry | Base                            | NMM (equiv) | Yield of <b>2</b> <sup>a</sup> | Yield of <b>1</b> <sup>a</sup> | Yield of <i>exo:endo</i> ratio <sup>a</sup> |
|-------|---------------------------------|-------------|--------------------------------|--------------------------------|---------------------------------------------|
| 1     | NaOAc                           | 20          | 53                             | <5                             | 5.1:1                                       |
| 2     | None                            | 20          | 41                             | 17                             | 3.8:1                                       |
| 3     | K <sub>2</sub> HPO <sub>4</sub> | 20          | 36                             | 30                             | 3.2:1                                       |
| 4     | 2,6-lutidine                    | 20          | 33                             | 30                             | 2.9:1                                       |
| 5     | Imidazole                       | 20          | 22                             | 48                             | 2.1:1                                       |
| 6     | DBU                             | 20          | <5                             | >95                            | N/A                                         |
| 7     | NaHCO <sub>3</sub>              | 20          | 33                             | 27                             | 3.6:1                                       |
| 8     | K <sub>2</sub> CO <sub>3</sub>  | 20          | 39                             | 17                             | 3.8:1                                       |

<sup>a</sup>Reactions performed at a 0.231 mmol scale, at 5 °C with 1.0 mol% Ir(ppy)<sub>3</sub>, 1.0 equiv of base, 20 equiv of NMM for 8 h unless otherwise stated. <sup>a</sup>Calculated by UPLC (PDA).

The use of NaOMe or KO<sup>t</sup>Bu as base caused an instant black color and the reaction was not attempted. It is likely that those bases are not compatible with **1**.

## 5.0 Variation of photocatalyst

**Table S2:** Variation of photocatalyst

| Entry            | Photocatalyst                                                        | Yield of <b>2</b> <sup>a</sup> | Yield of <b>1</b> <sup>a</sup> | <i>exo:endo</i> ratio <sup>a</sup> |
|------------------|----------------------------------------------------------------------|--------------------------------|--------------------------------|------------------------------------|
| 1 <sup>b</sup>   | [Ru(bpy) <sub>3</sub> ]Cl <sub>2</sub>                               | <5                             | 86                             | N/A                                |
| 2 <sup>b</sup>   | [Ru(bpz) <sub>3</sub> ](PF <sub>6</sub> ) <sub>2</sub>               | <5                             | 86                             | N/A                                |
| 3                | Ru(Phen) <sub>3</sub> Cl <sub>2</sub>                                | <5                             | 82                             | N/A                                |
| 4                | Ru(bpm) <sub>3</sub> Cl <sub>2</sub>                                 | <5                             | 85                             | N/A                                |
| 5 <sup>c,d</sup> | Cu(dap) <sub>2</sub> Cl (2 mol%)                                     | <5 <sup>e</sup>                | 92 <sup>e</sup>                | N/A                                |
| 6 <sup>c</sup>   | Fukuzumi Acridinium <sup>f</sup><br>(2mol%)                          | 8 <sup>e</sup>                 | 82                             | 3.9:1                              |
| 3 <sup>c</sup>   | Eosin Y (5 mol%)                                                     | 22                             | 48                             | 3.7:1                              |
| 4                | Ir(Fppy) <sub>3</sub>                                                | 21                             | 48                             | 3.6:1                              |
| 5                | [Ir(py) <sub>2</sub> (dtbbpy)]PF <sub>6</sub>                        | 11                             | 71                             | 2.3:1                              |
| 6                | [Ir{(dF(CF <sub>3</sub> )ppy) <sub>2</sub> (dtbbpy)}]PF <sub>6</sub> | 17                             | 58                             | 2.9:1                              |

<sup>a</sup>Reactions performed at a 0.231 mmol scale, at 5 °C with 1.0 mol% Ir(ppy)<sub>3</sub>, 1.0 equiv of base, 20 equiv of NMM for 8 h unless otherwise stated. <sup>a</sup>Calculated by UPLC (PDA). <sup>b</sup>Reaction time of 10 h. <sup>c</sup> Reaction time of 15 h. <sup>d</sup> Tested in CH<sub>2</sub>Cl<sub>2</sub> and DMA <sup>e</sup>Crude% a/a. <sup>f</sup>See *J. Am. Chem. Soc.*, 2004, **126**, 1600-1601

## 6.0 Solvent additives effects and the use of DMPU

Reactions were conducted at 22 °C for 16 h on a 0.231 mmol scale using 1 mol% Ir(ppy)<sub>3</sub>, NaOAc (1.0 equiv) and 10:1 DMA:additive (6.5 mL/mmol).

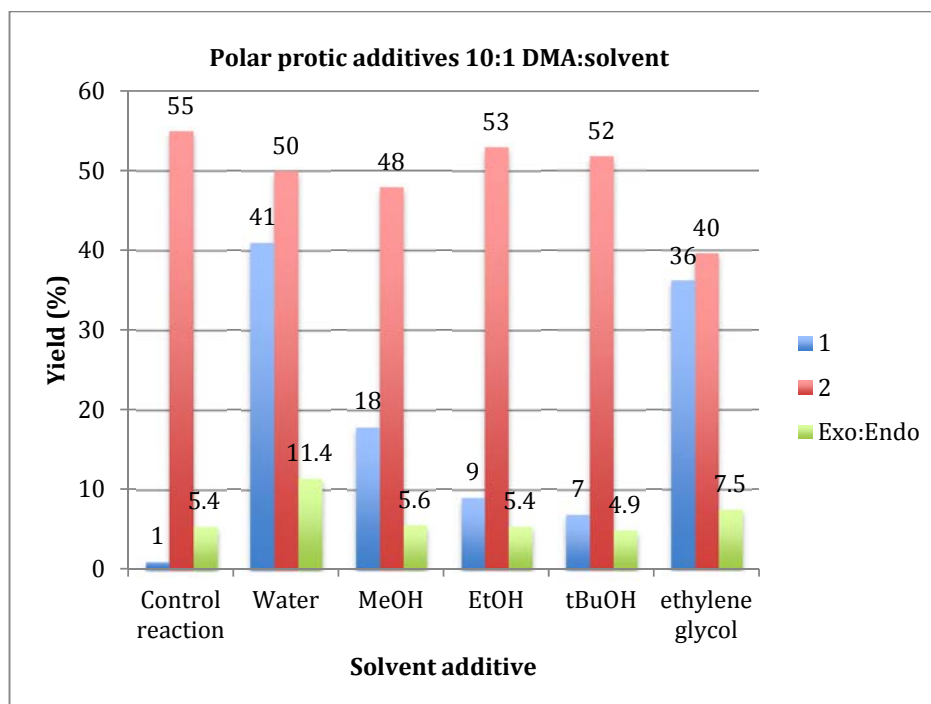

**Figure S15.** Effect of polar protic solvent additives.

## 7.0 Final reaction conditions

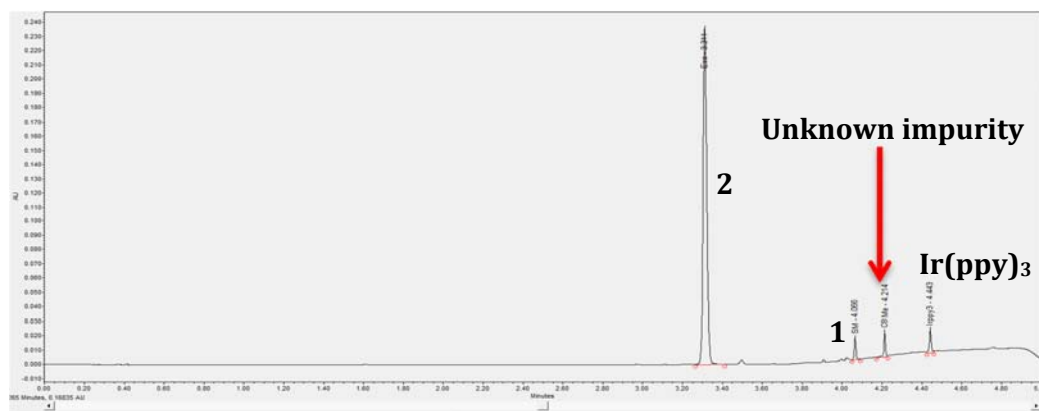

S16. UPLC trace of solids after filtration.

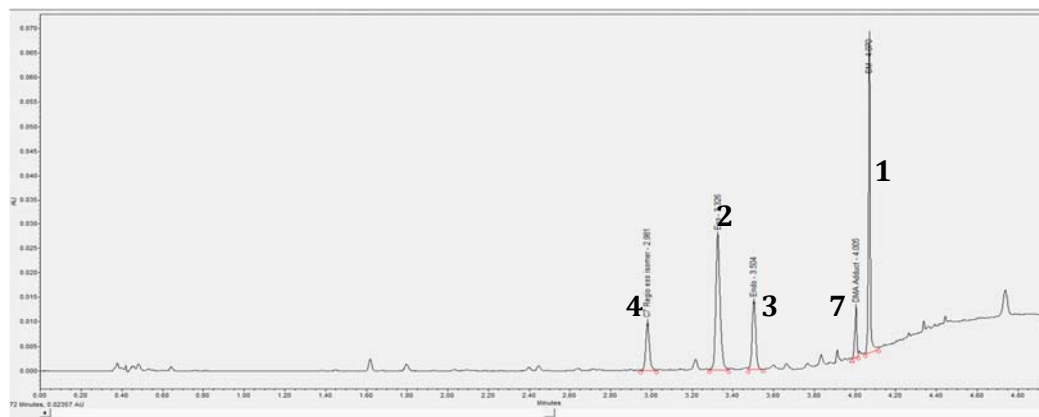

S17. UPLC trace of filtrate after filtration.

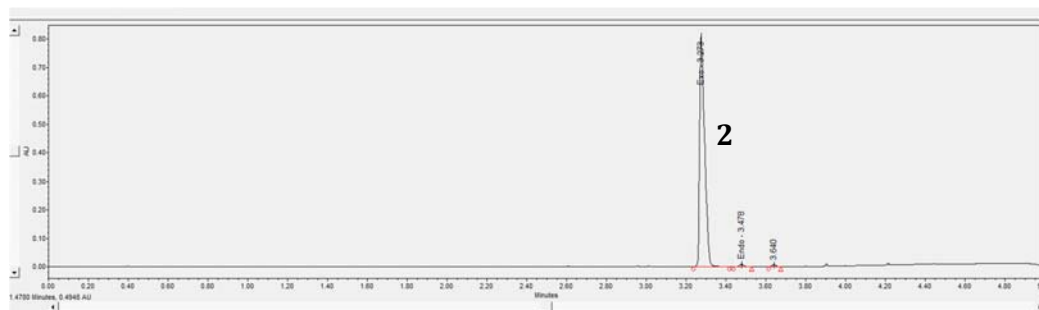

S18. UPLC trace of solids after acid base purification.

In one isolated instance using 1.0 mol% Ir(ppy)<sub>3</sub> **2** failed to precipitate from the reaction mixture giving an estimate of conversion after 28 h.

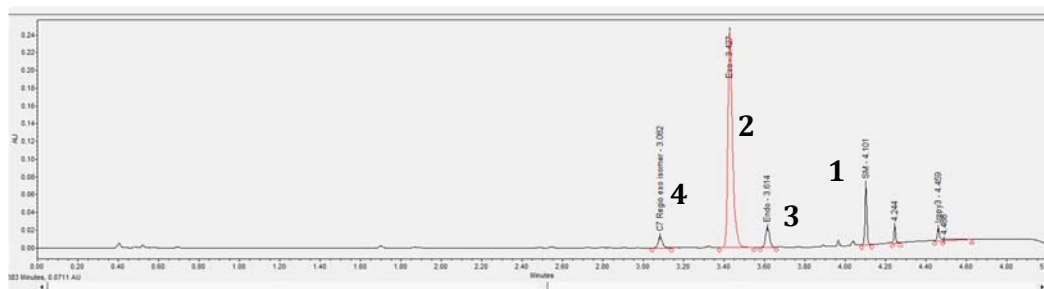

**S19.** UPLC trace of crude reaction mixture that failed to precipitate **2**.

## 8.0 Chiral HPLC trace for **21**

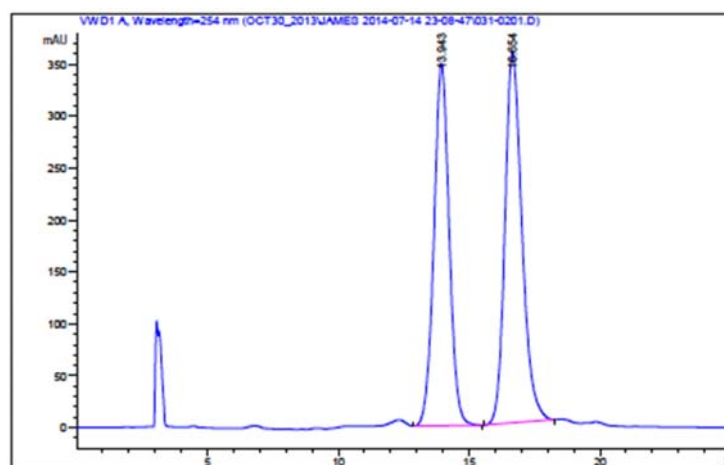

**Figure S20.** HPLC trace of racemic **21**

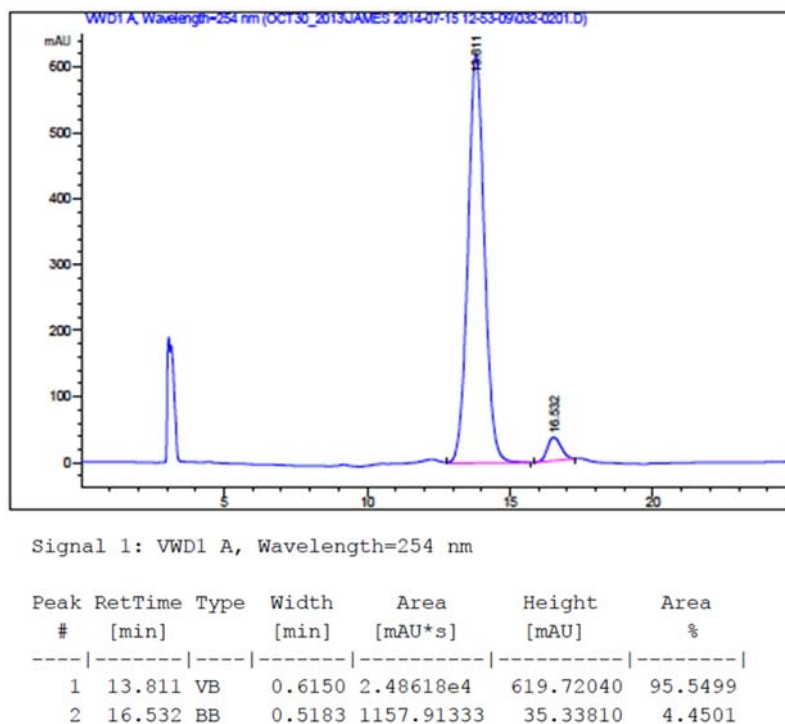

**Figure S21.** HPLC trace of enantioenriched **21**

### 9.0 Attempted expansion to other heterocycles.

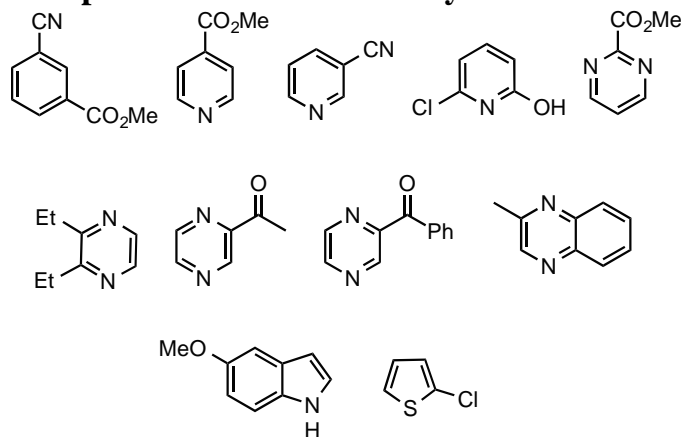

**Figure S22.** Other arenes and heteroarenes that failed to react.

The use of 3,6-dichloropyridazine with TMEDA led to incomplete conversion and low isolated crude mass recovery.  $^1\text{H}$  spectroscopic analysis of the crude reaction mixture indicated the formation of the addition product and the formal methylation product. The isolation of these products, and the corresponding NMM addition products was hampered by hydrolysis of one of the chlorines leading to increased aqueous solubility.



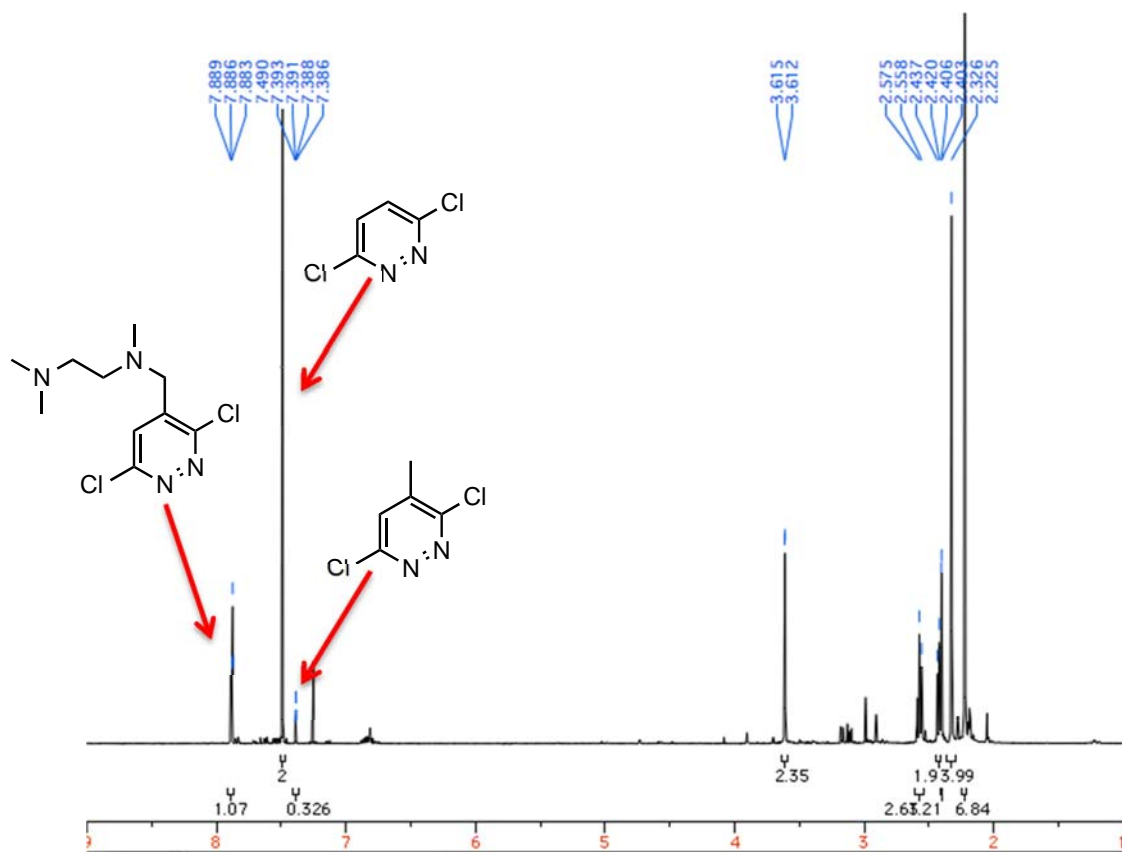

**Figure S23.** <sup>1</sup>H NMR spectrum of the crude reaction of 3,6-dichloropyridazine with TMEDA.

## 10.0 Quenching studies

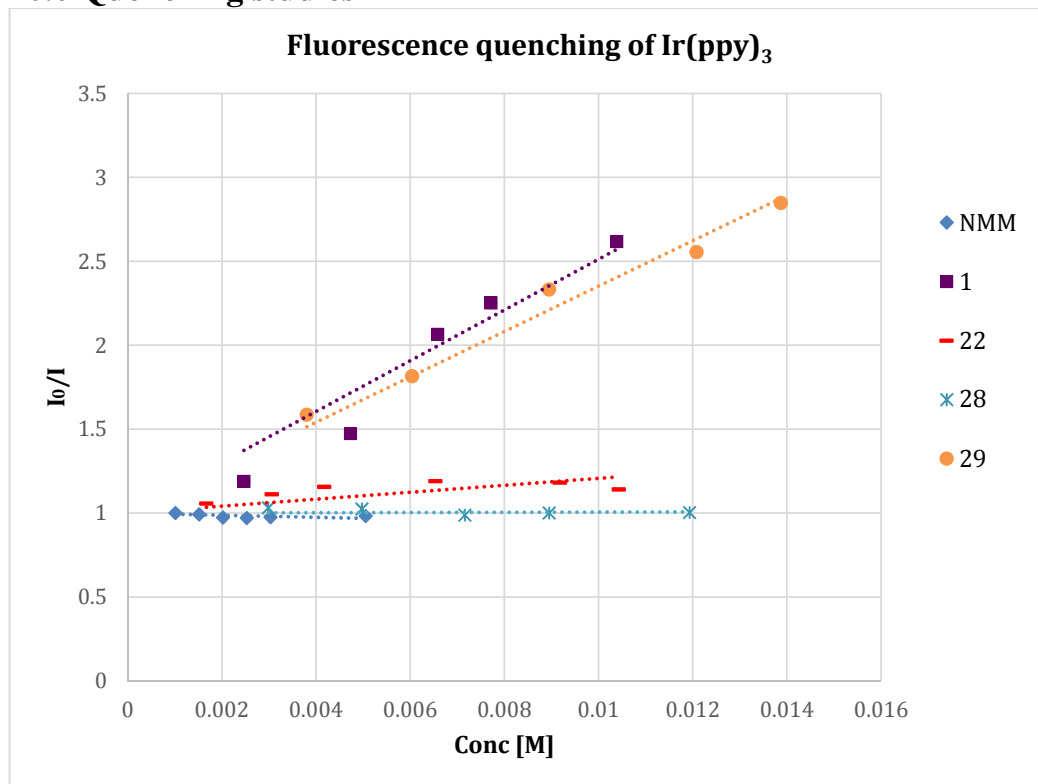

**Figure S24.** Fluorescence quenching of Ir(ppy)<sub>3</sub>

All quenching data was recorded in a quartz cuvette with a stir bar at 25 °C with DMA as the solvent with no action taken to exclude oxygen. Excitation was at 450 nm (NMM) or 350 nm (**1**, **22**, **28** and **29**) with emission at 520 nm. At 450 nm fluorescence was observed for **1** and **22**. All values are the average of 3 measurements. It is interesting to note that **22** is reactive but does not quench Ir(ppy)<sub>3</sub> under the same concentration as **1**. This may be indicative of different mechanisms available for **1** and **22**.

### 11.0 Lights-on-lights-off experiment

**1** (75.0 mg, 0.231 mmol, 1.0 equiv), sodium acetate (19.0 mg, 0.231 mmol, 1.0 equiv), Ir(ppy)<sub>3</sub> (1.50 mg, 2.31 μmol, 0.01 equiv), DMA (1.50 mL) and *N*-methylnmorpholine (510 μL, 4.63 mmol, 20 equiv). In periods of the dark the reaction was wrapped in foil to exclude all light. The lights-on-lights-off data is an average of two reactions vs a control run identically at the same time. Data is quoted in crude area/area% UPLC.

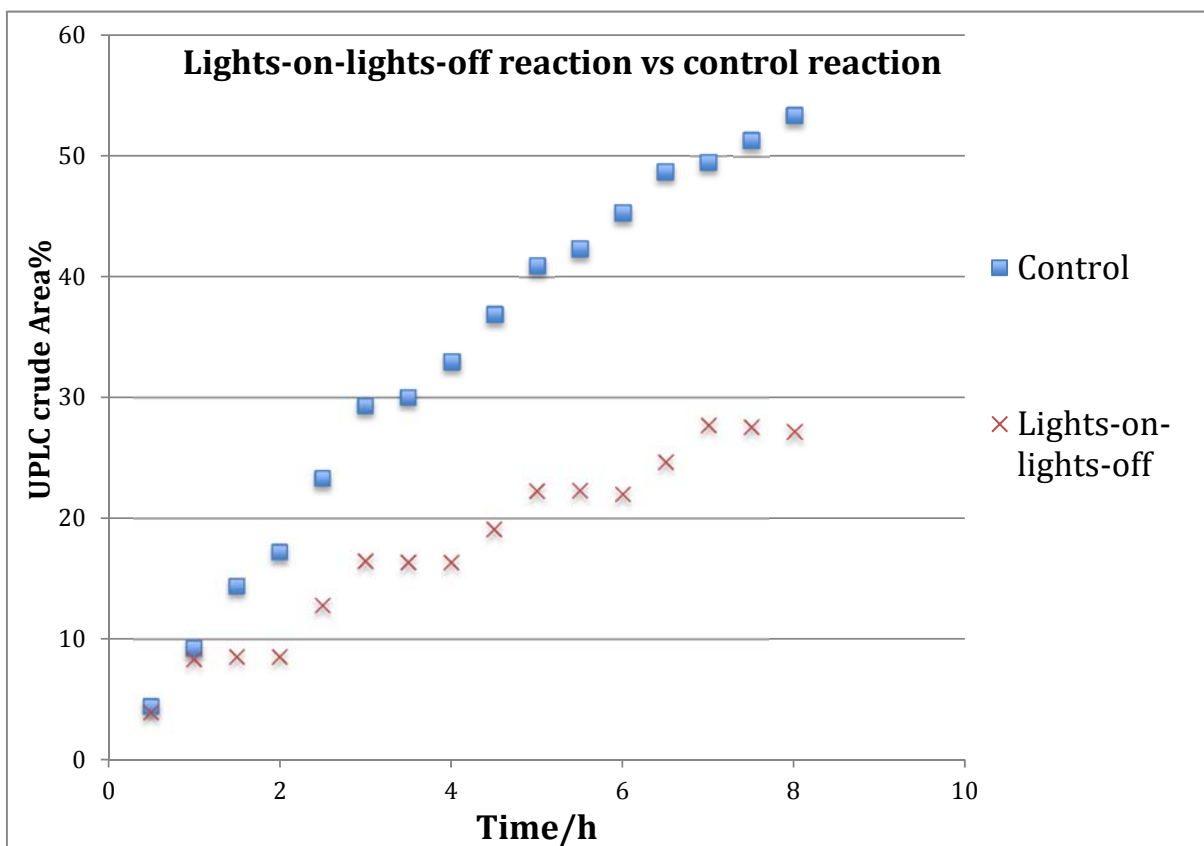

**Figure S25.** Graph showing UPLC area% Vs time in periods of light irradiation and dark.



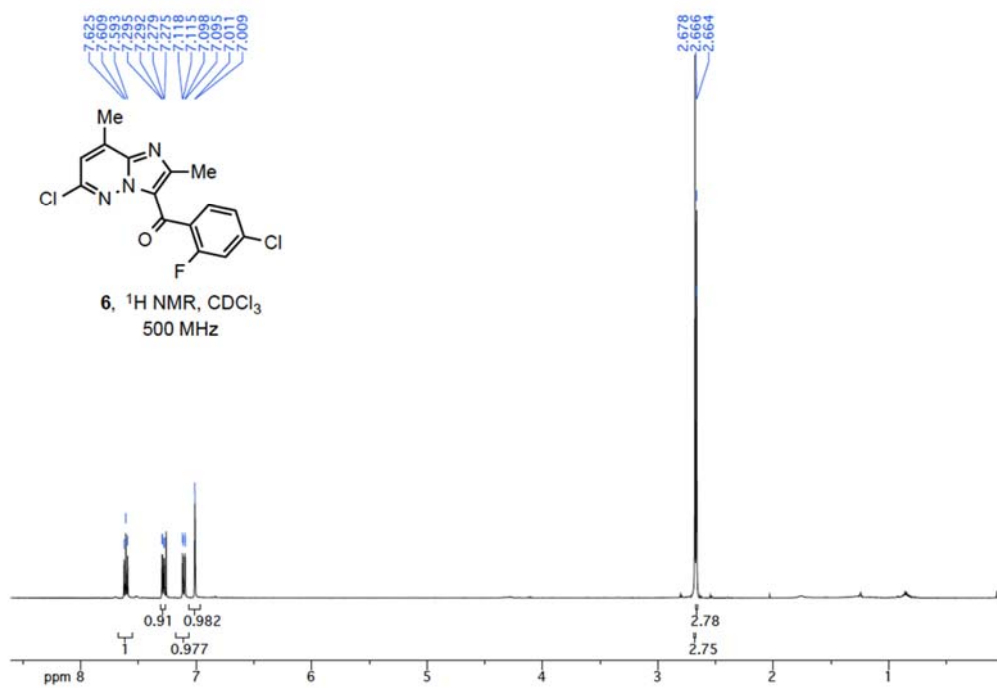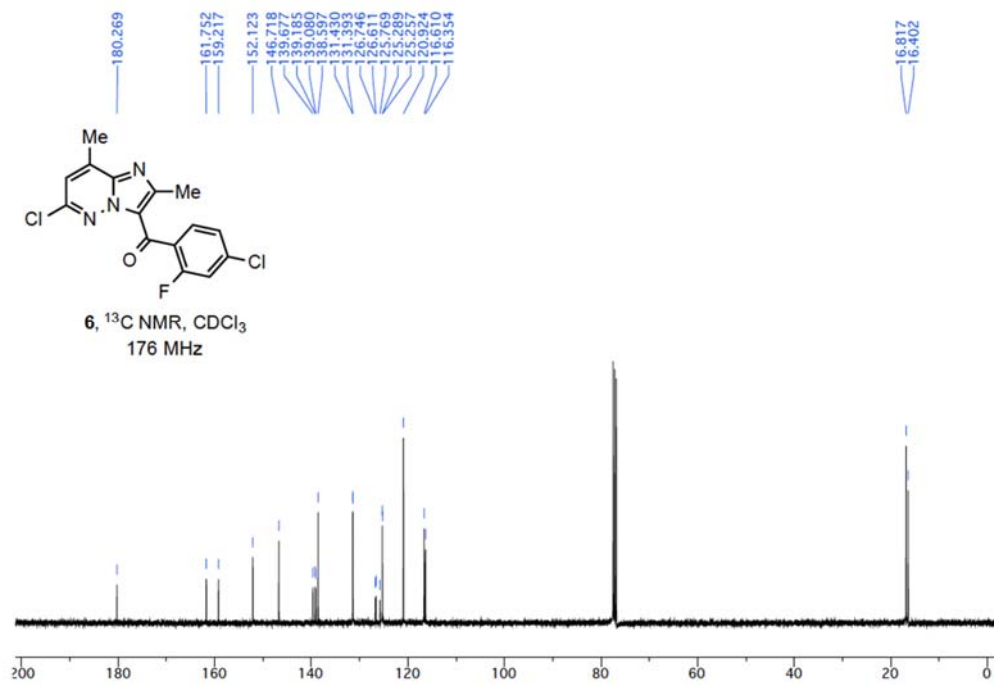

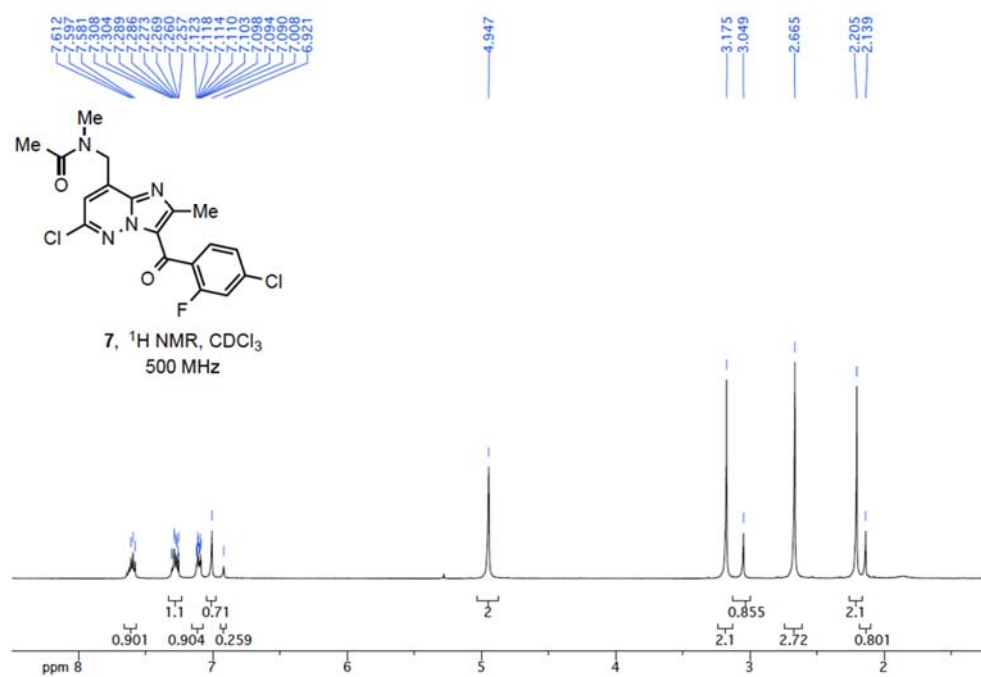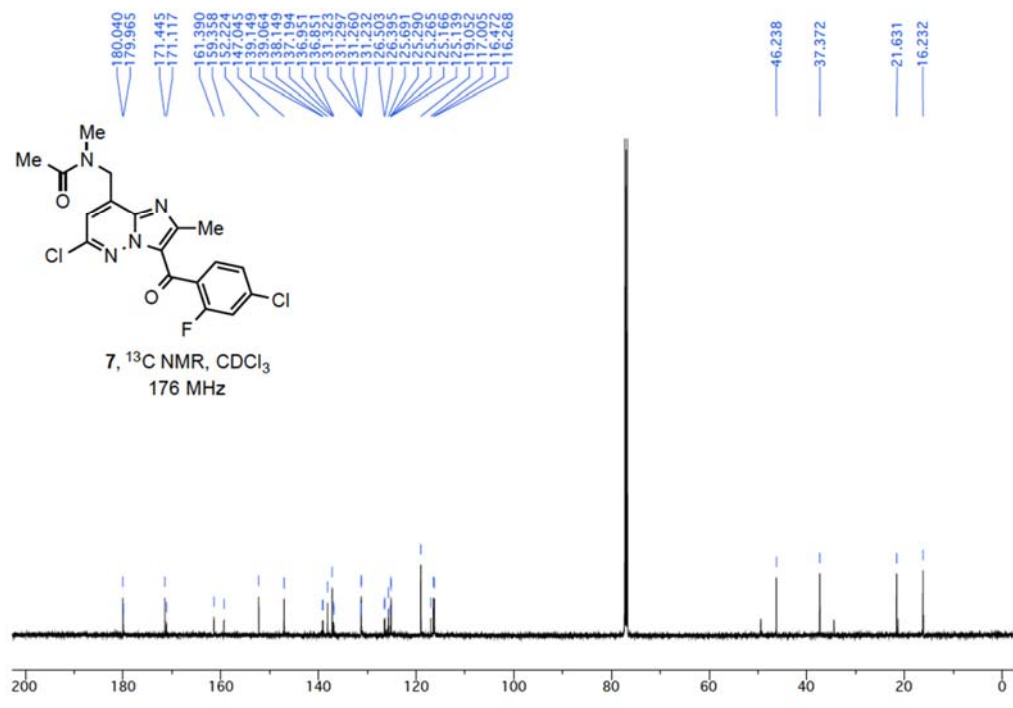



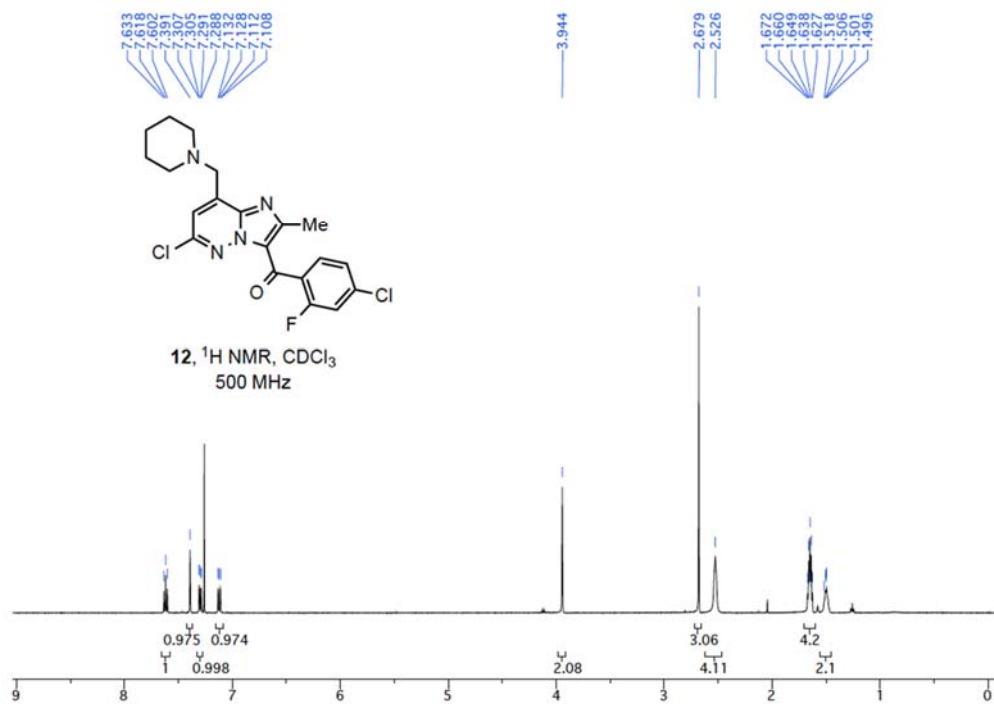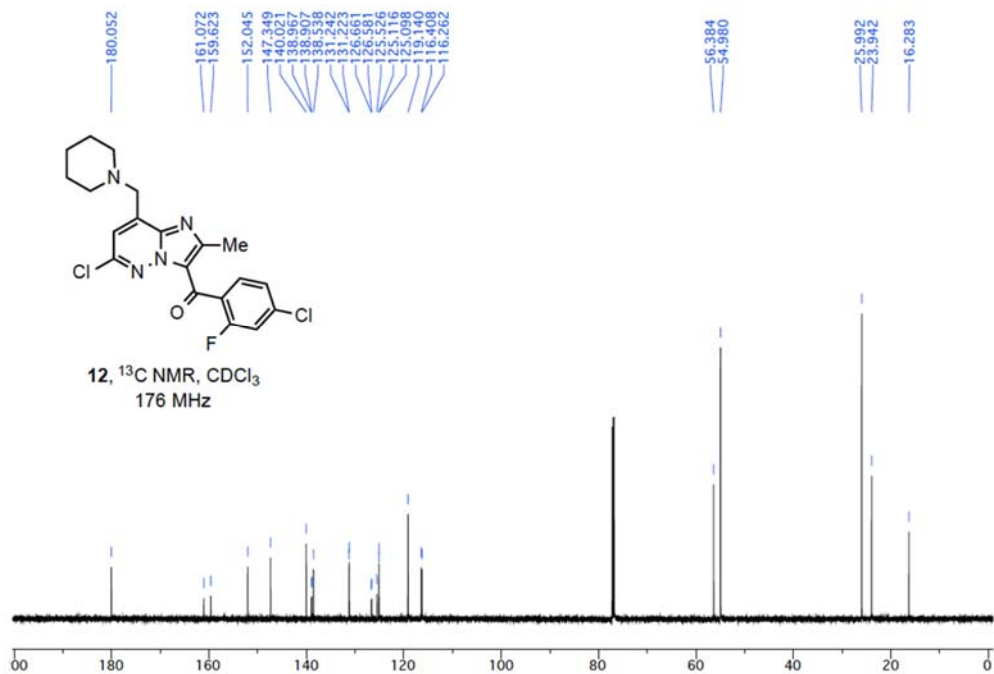



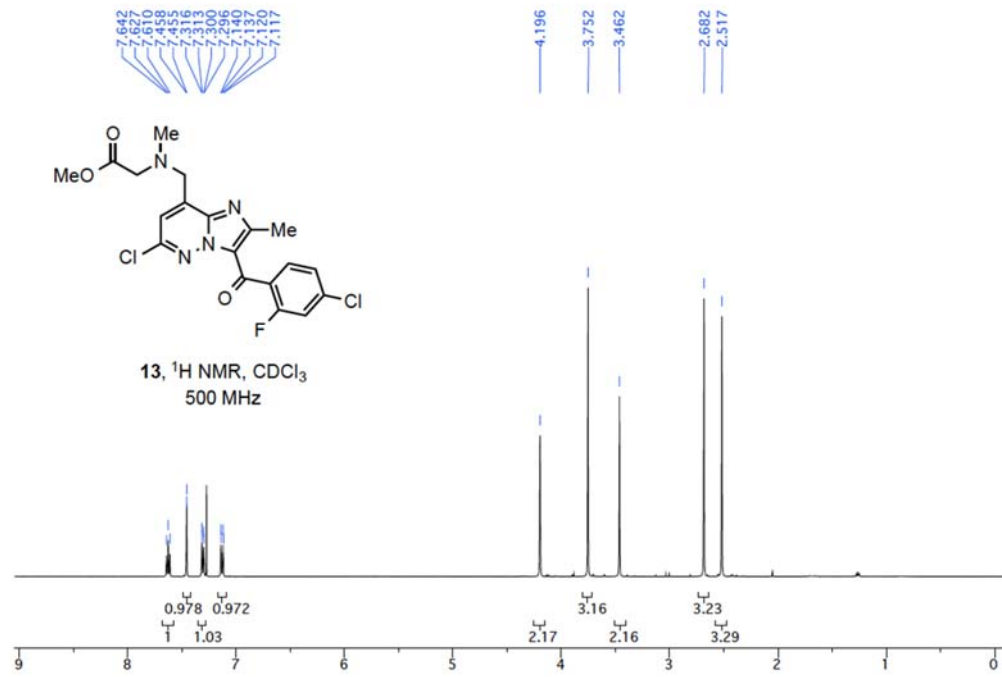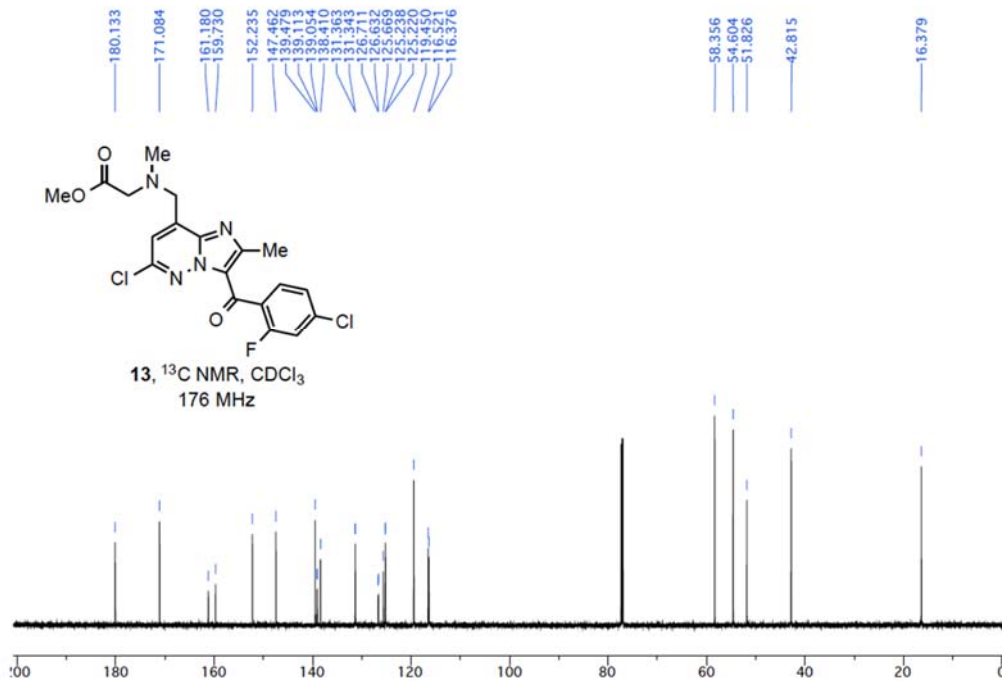

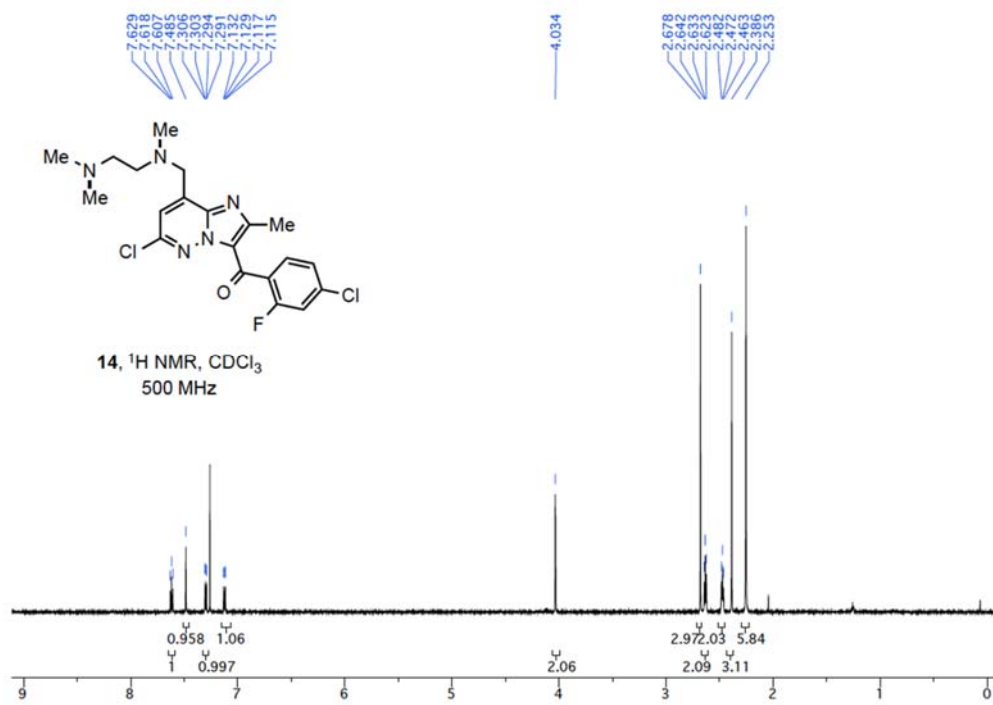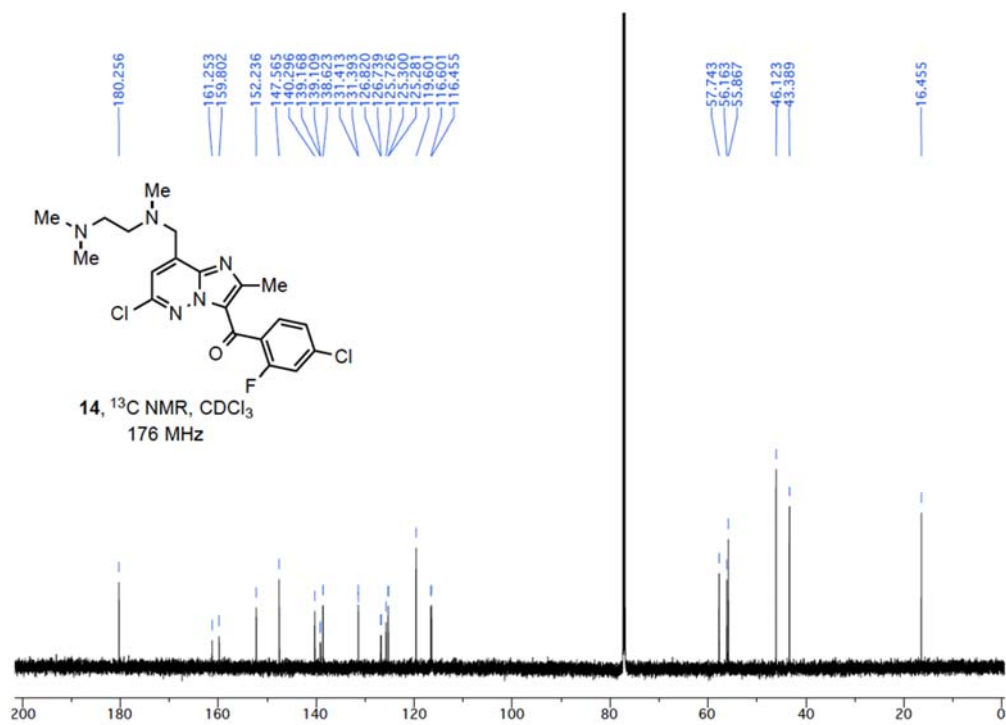

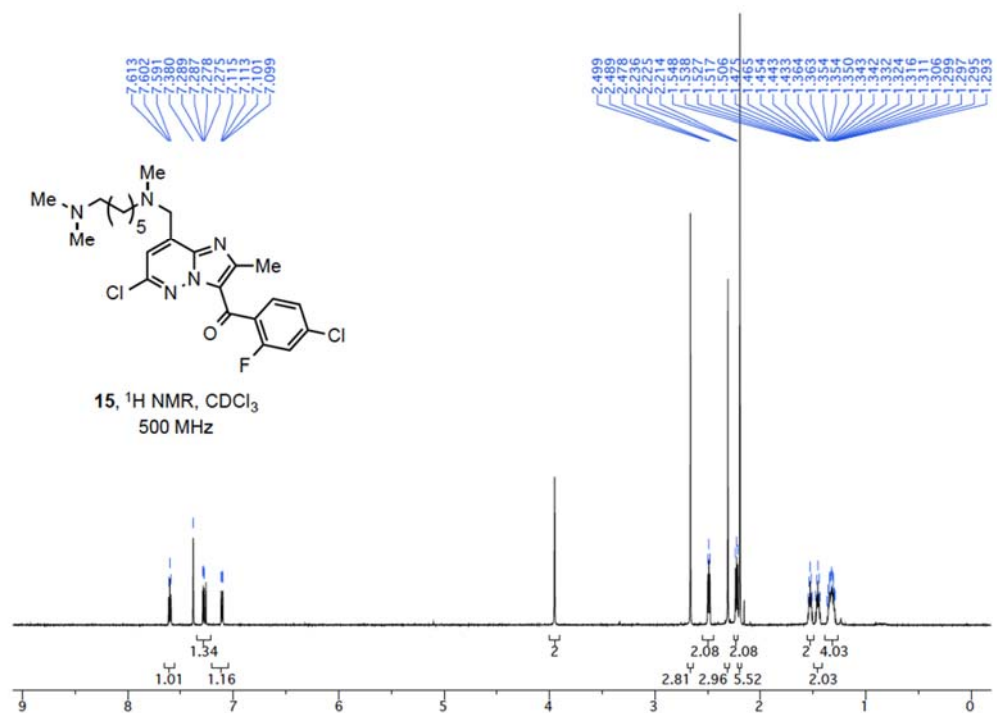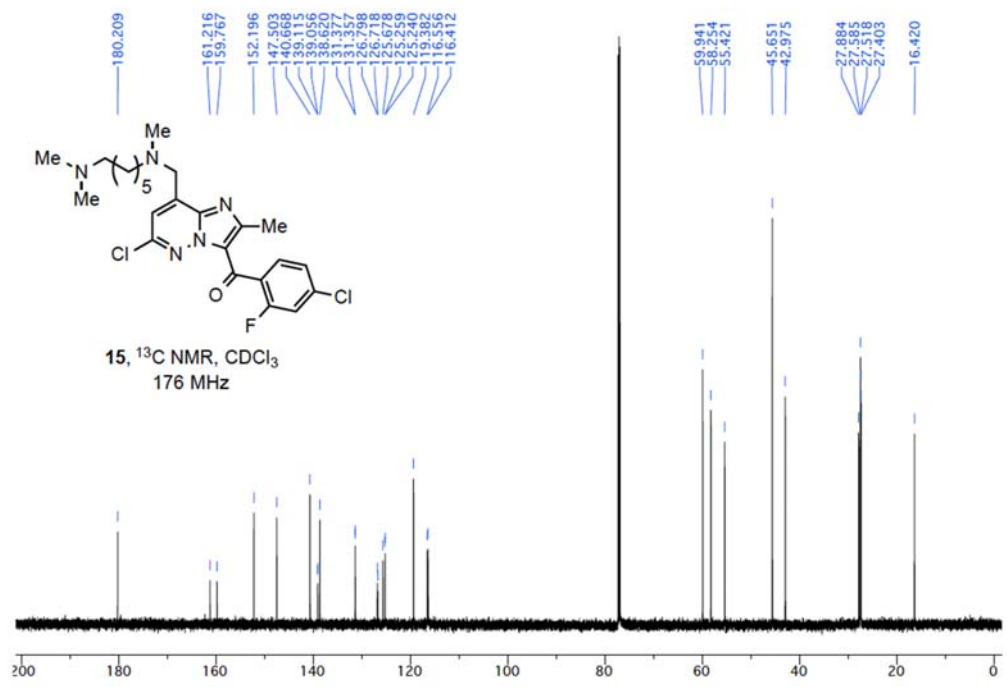

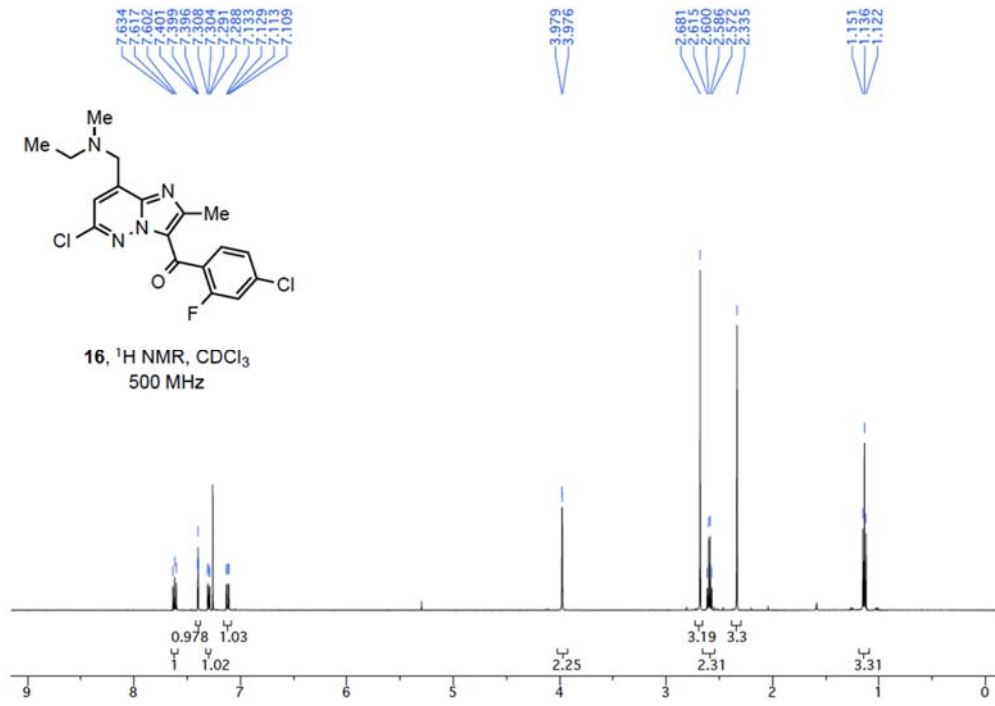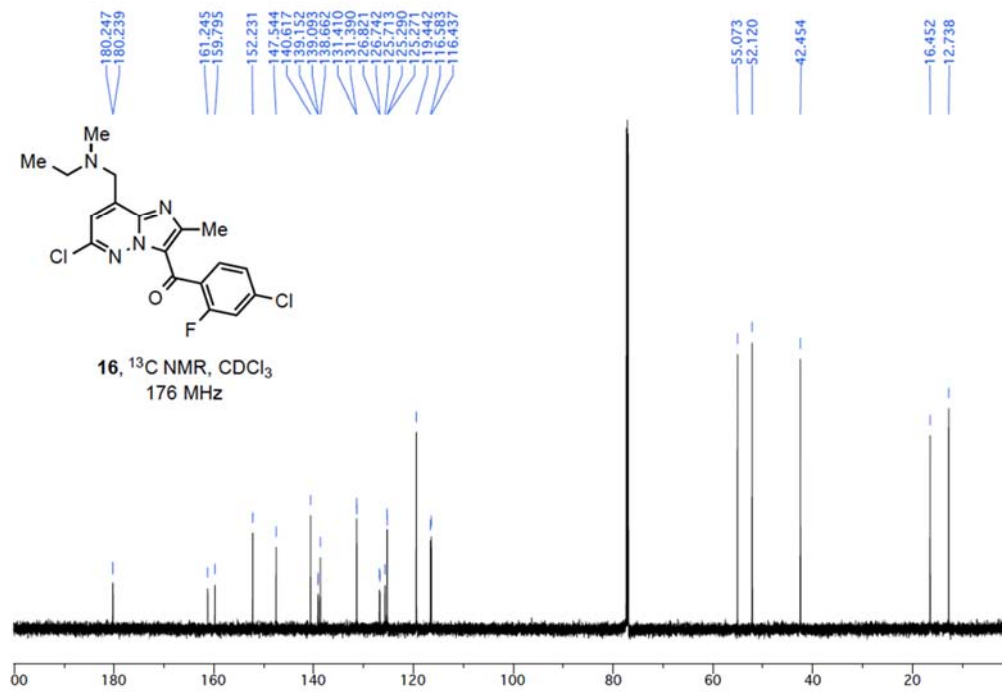

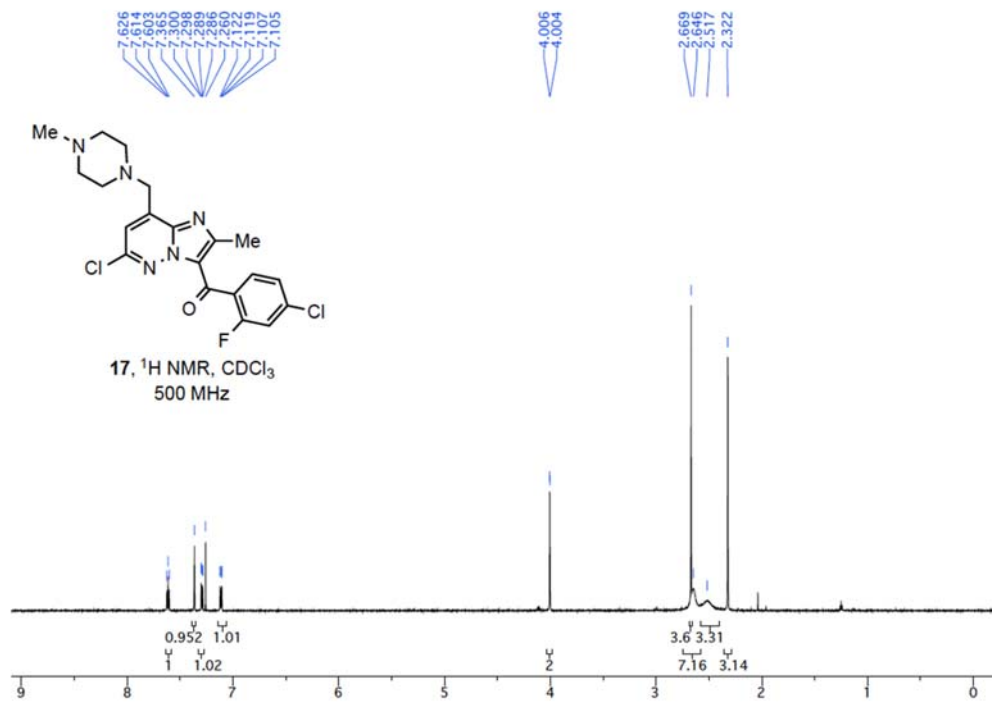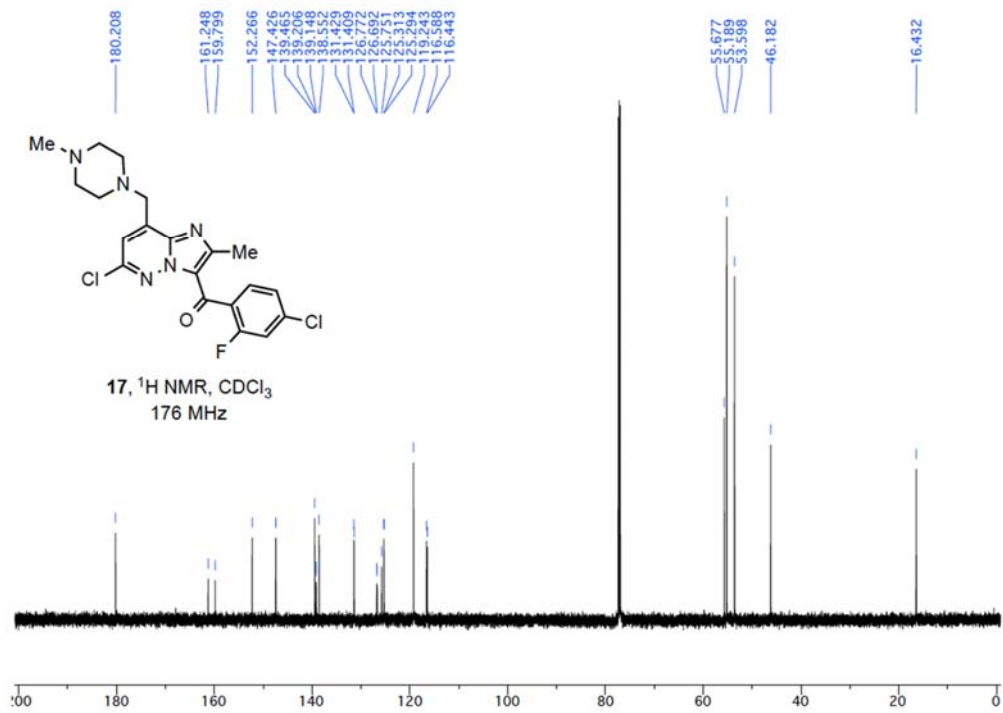

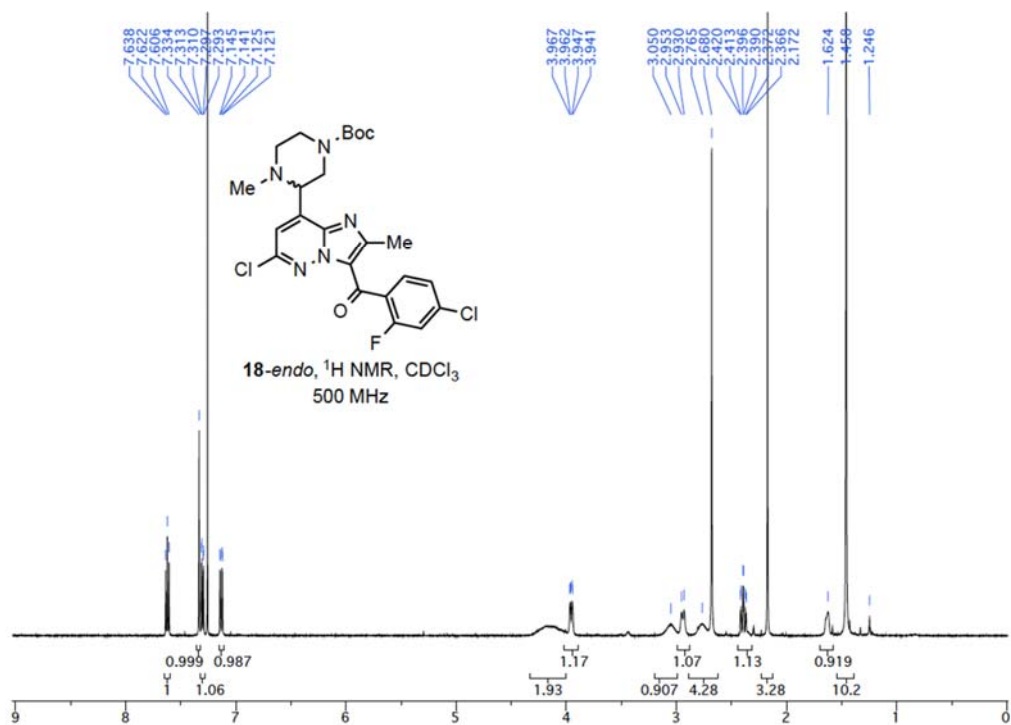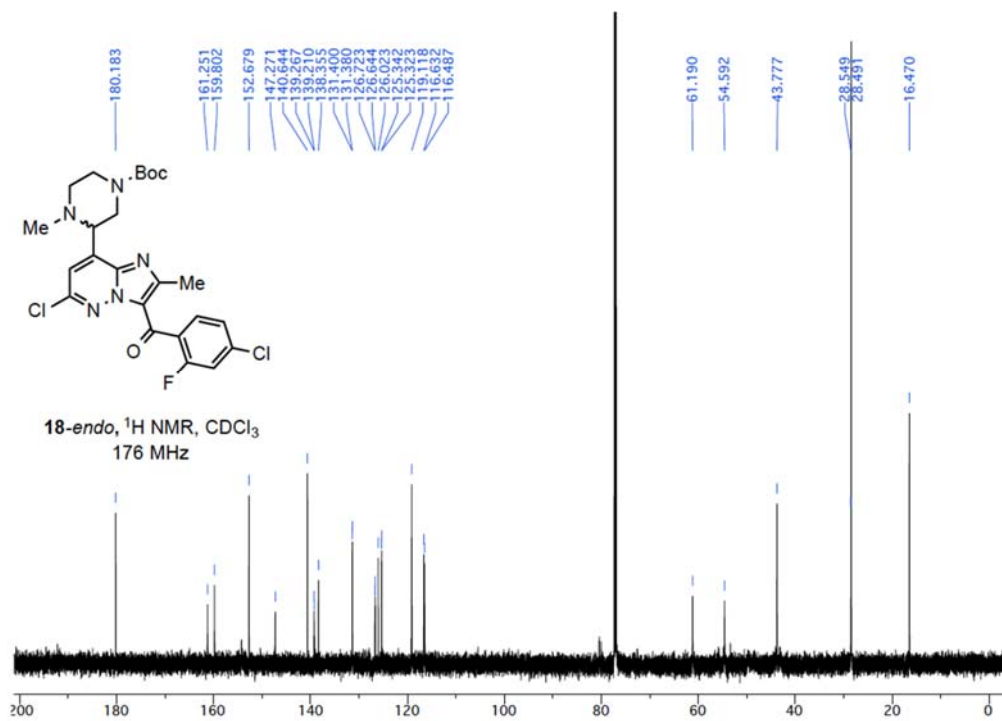

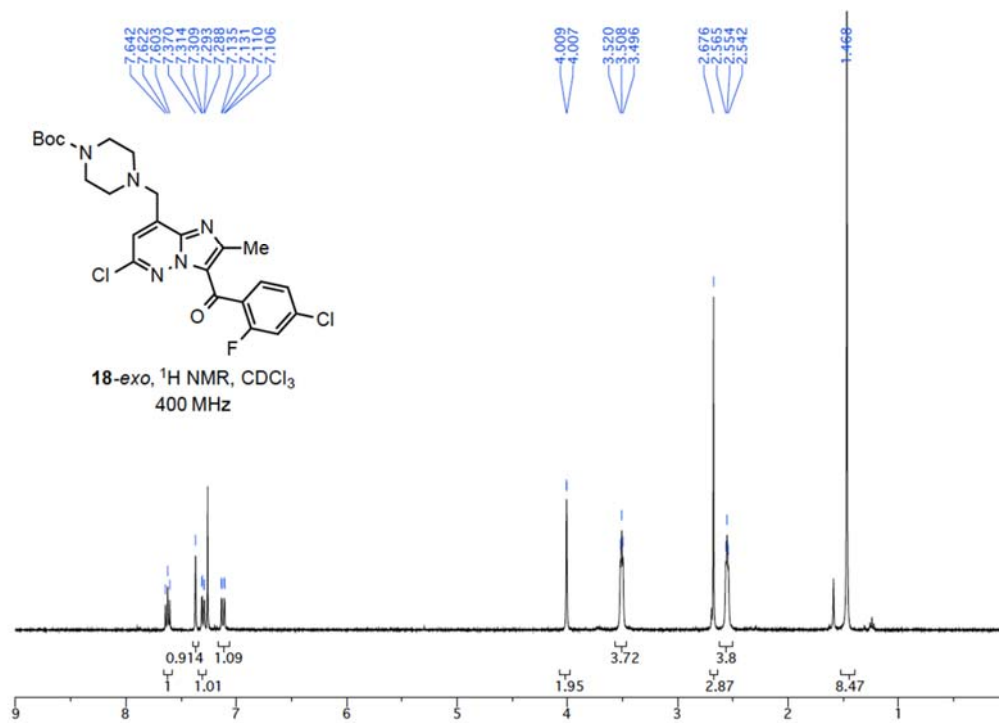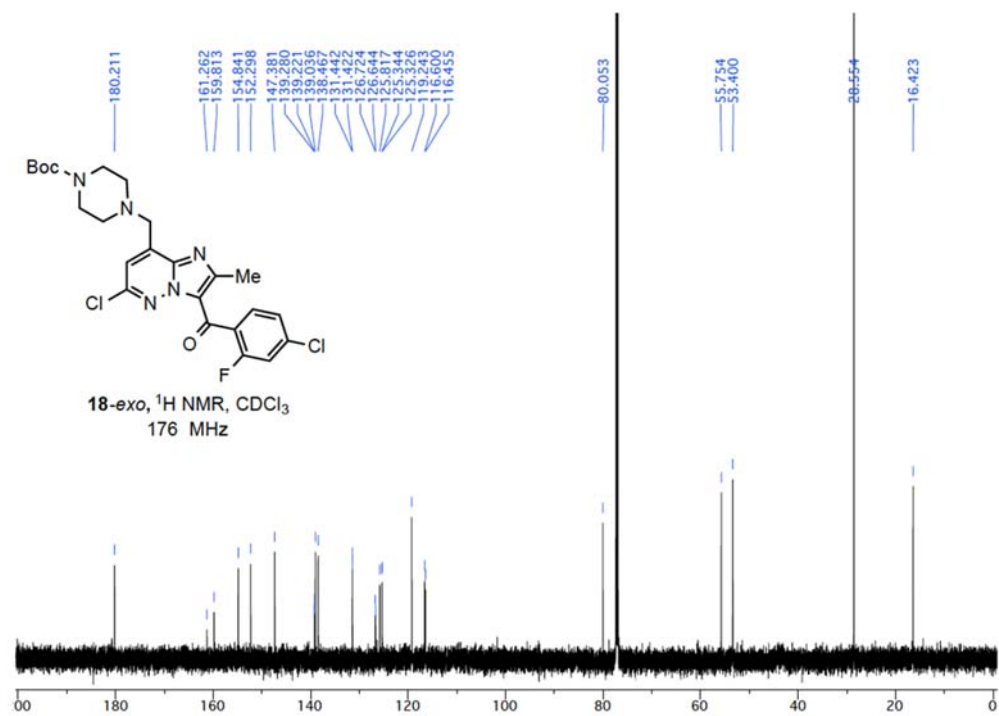

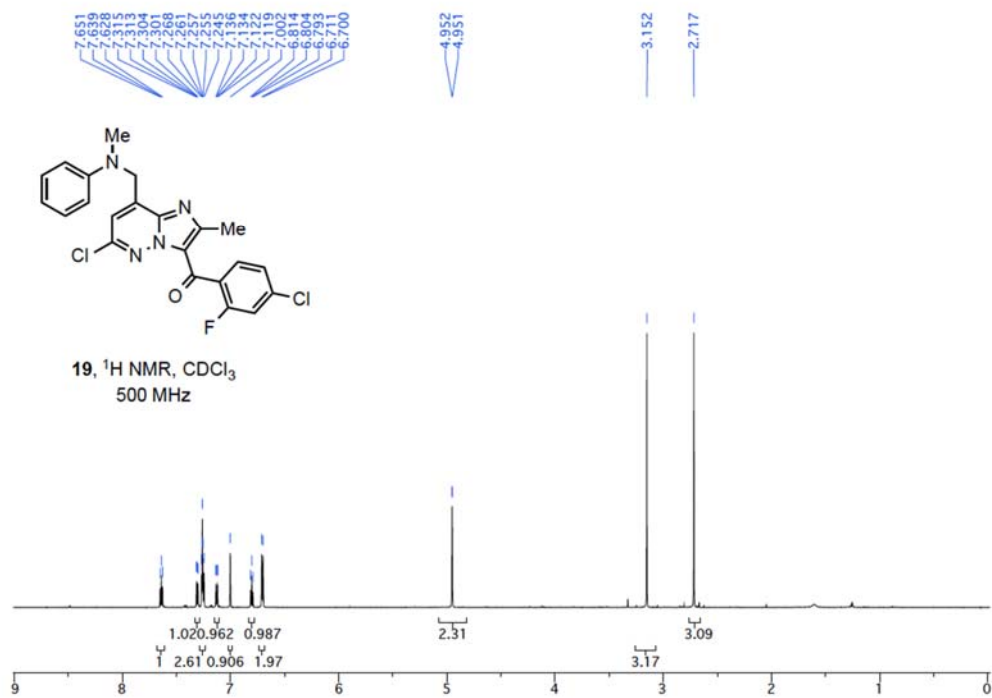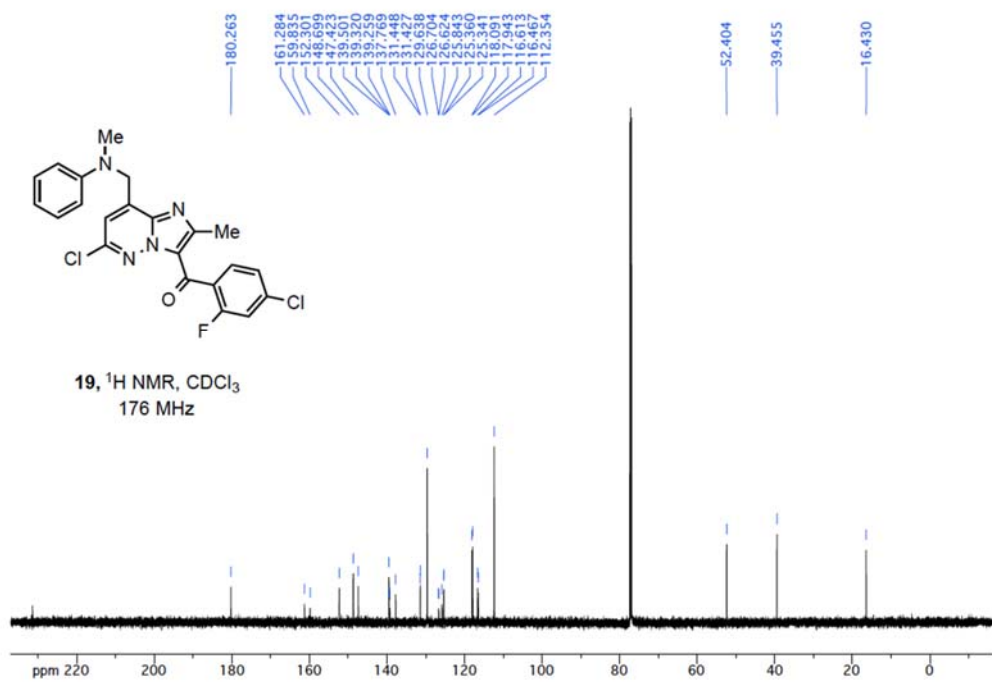



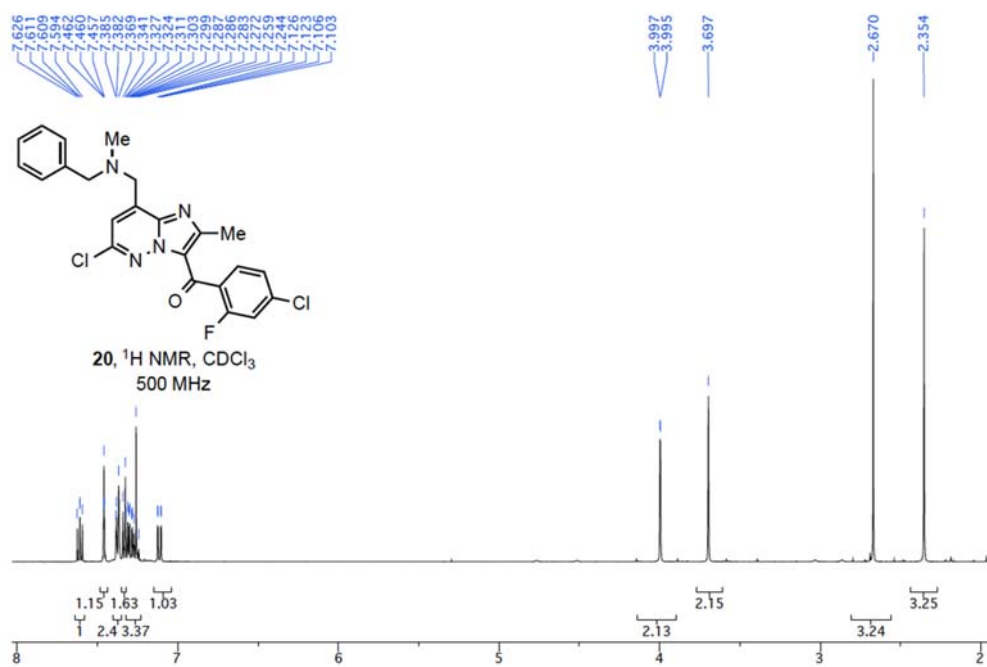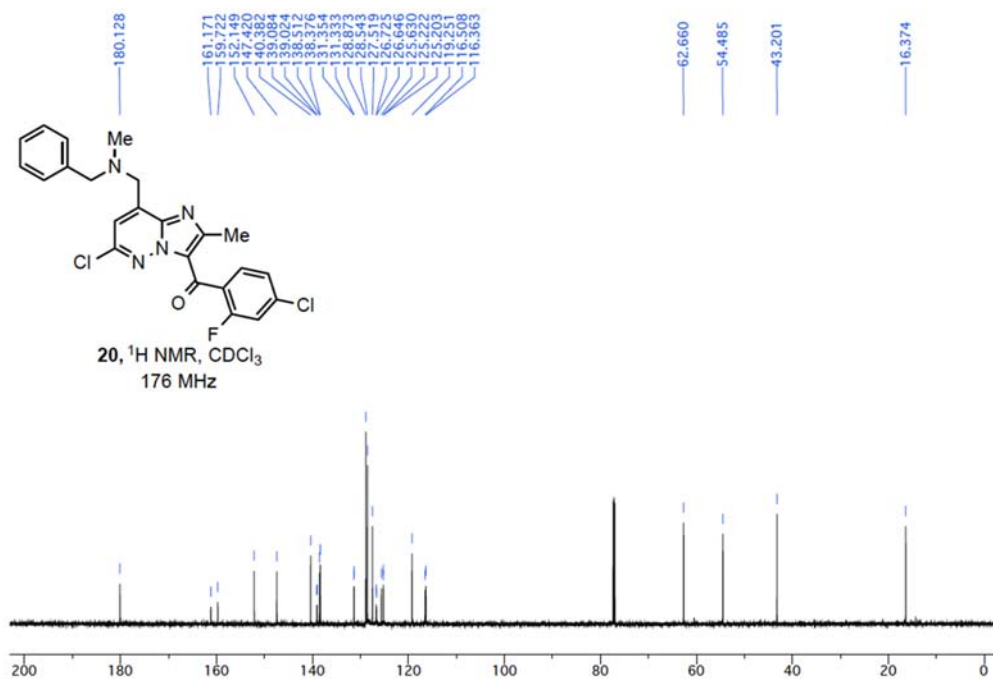

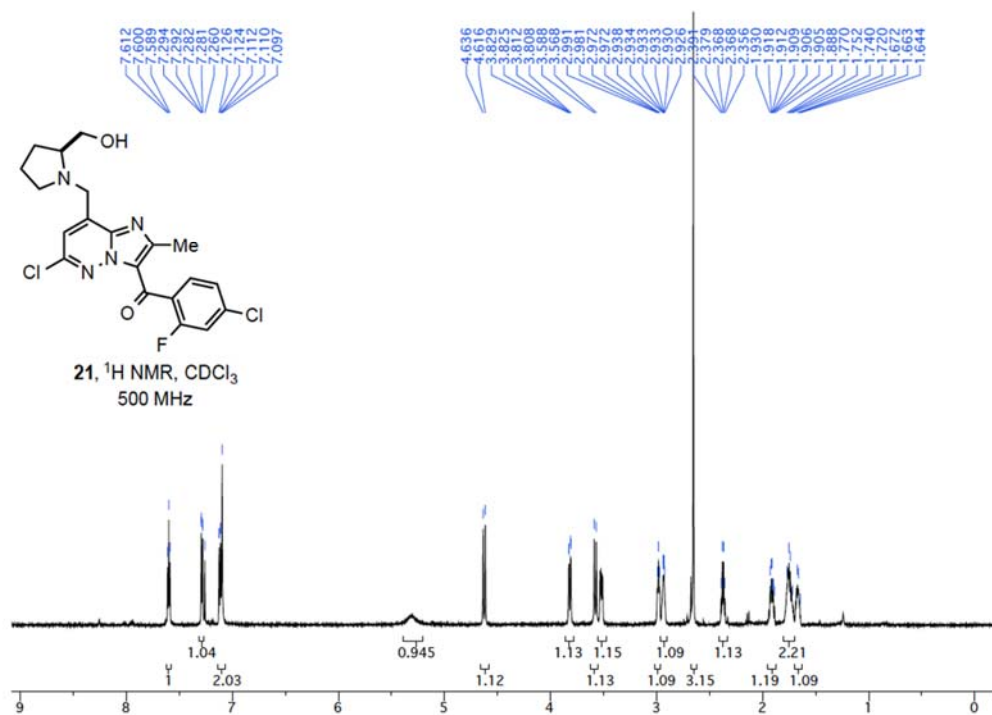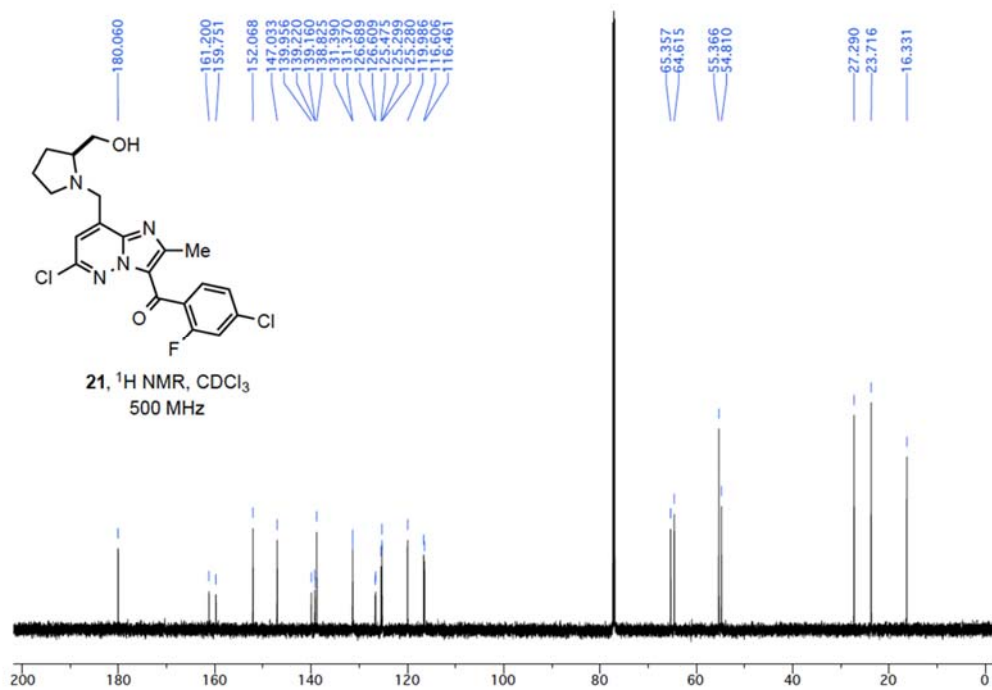

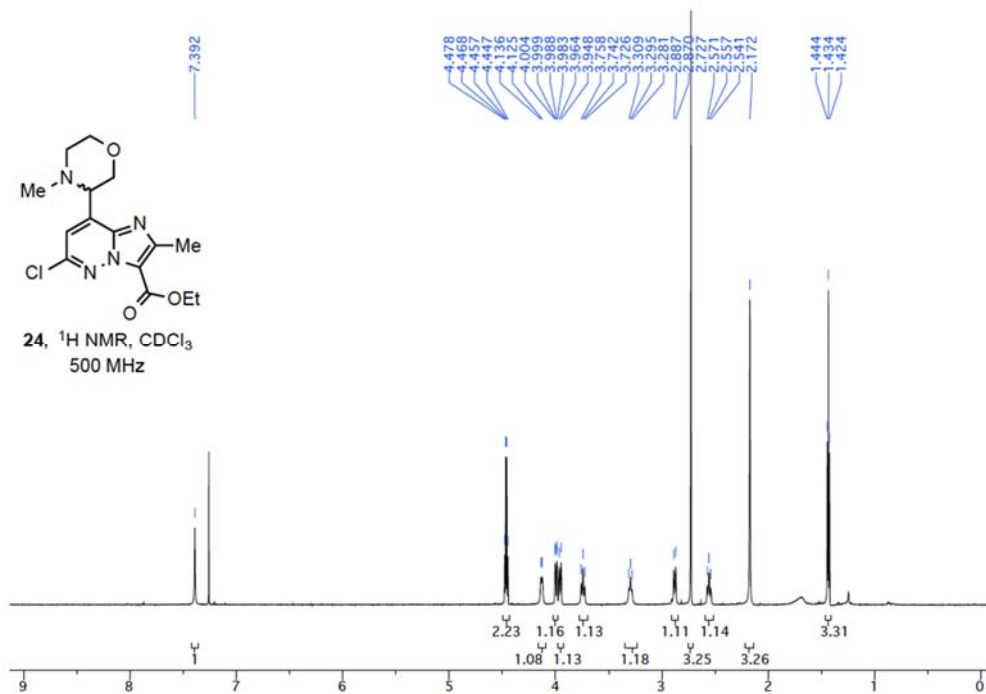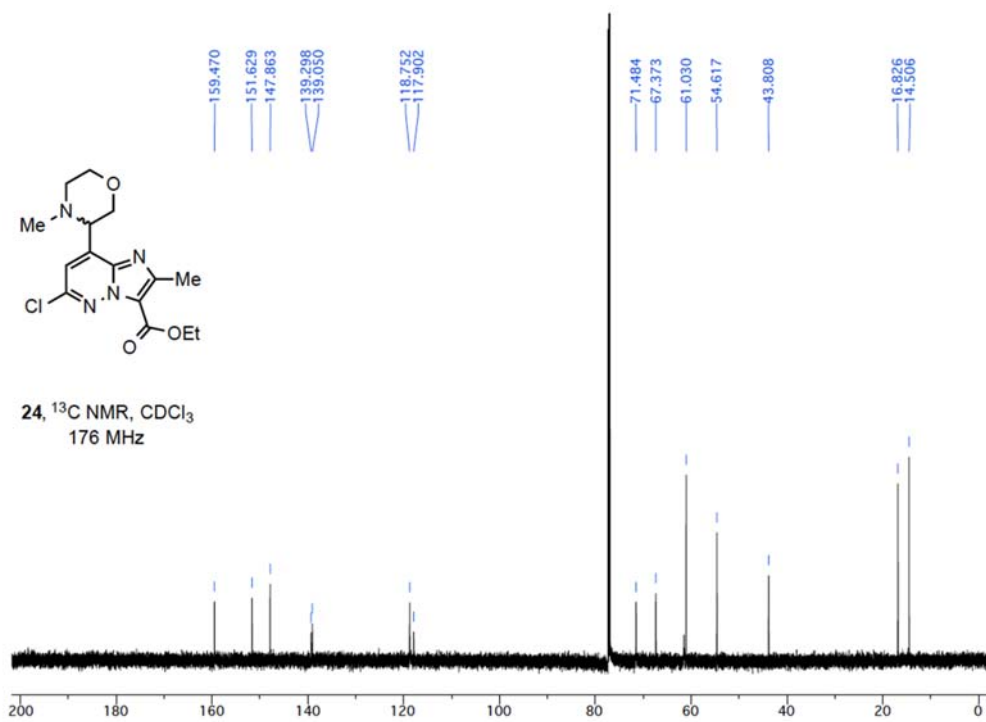

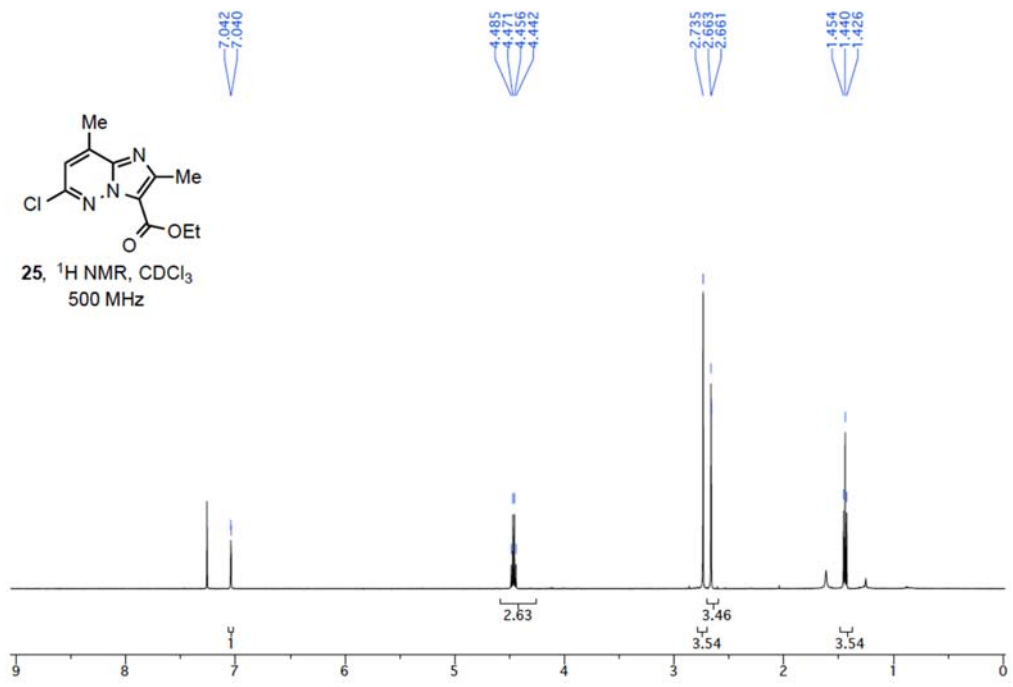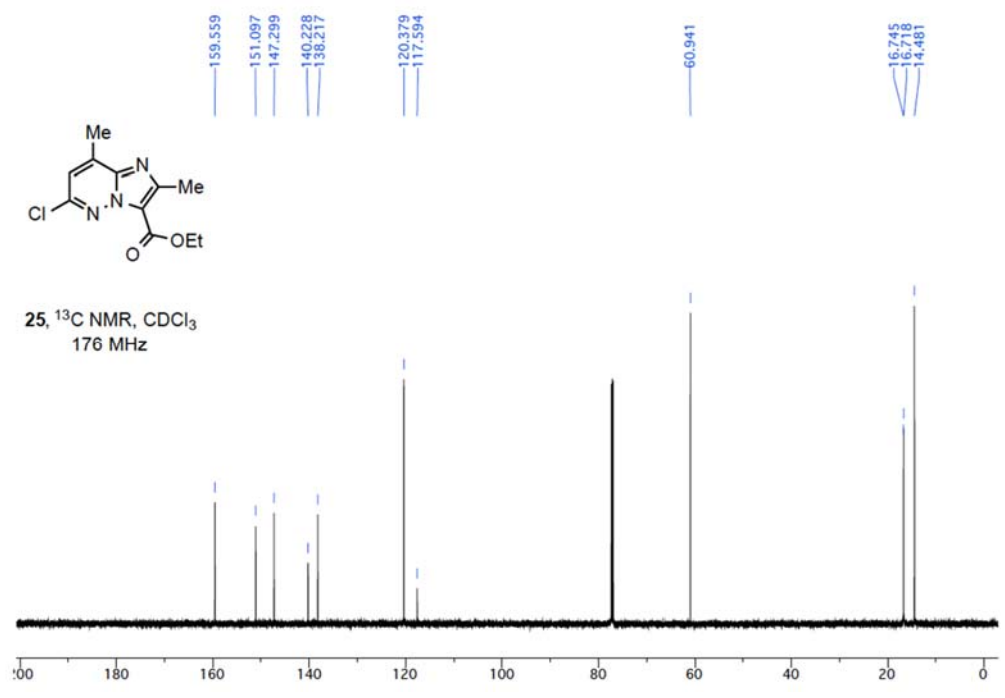

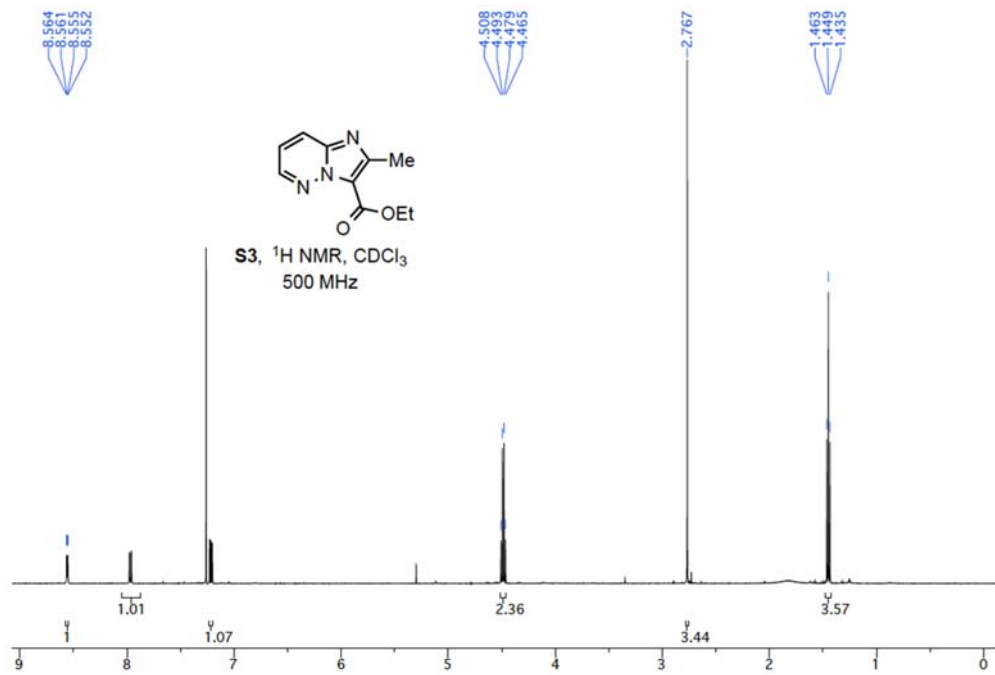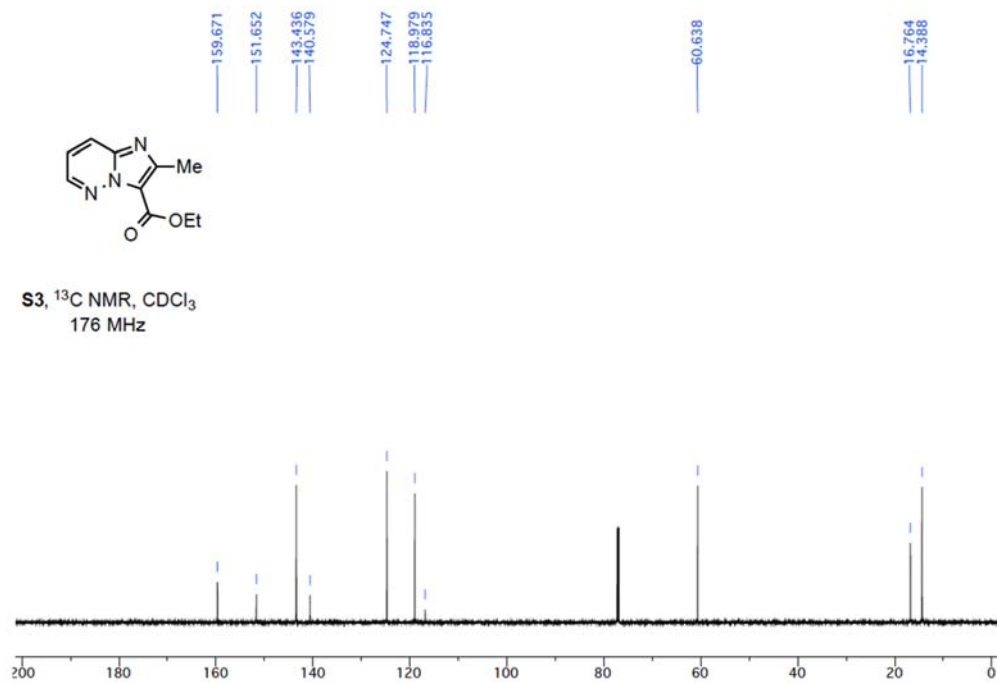

Supplement: jo502288q_si_001.pdf [file jo502288q_si_001.pdf]
